# Supplementary material for: Synthesis and Characterization of Dihydrouracil Analogs Utilizing Biginelli Hybrids
Source: MDPI journal article supplement (doi:10.3390/molecules27092939), 2022-05-04
Supplement: s1 [file s1]

# MOLECULES

Supplementary Information associated with the paper

## Synthesis and characterization of dihydrouracil analogs utilizing Biginelli hybrids

Syed Nasir Abbas Bukhari,<sup>1\*</sup> Hasan Ejaz,<sup>2</sup> Mervat Abdelaziz Mohamed Elsherif,<sup>3</sup> Nenad Janković,<sup>4\*</sup>

<sup>1</sup>Department of Pharmaceutical Chemistry, College of Pharmacy, Jouf University, Sakaka, Al Jouf, 72388, Saudi Arabia

<sup>2</sup>Department of Clinical Laboratory Sciences, College of Applied Medical Sciences, Sakaka, Jouf University, Al Jouf, 72388, Saudi Arabia

<sup>3</sup>Chemistry Department, College of Science, Jouf University, Al Jouf, 72388, Sakaka, Saudi Arabia

<sup>4</sup>University of Kragujevac, Institute for Information of Technologies Kragujevac, Department of Science, Jovana Cvijića bb, 34000 Kragujevac, Serbia

Corresponding author's e-mail address: sbukhari@ju.edu.sa and nenad.jankovic@kg.ac.rs

## Table of Contents

### NMR spectra of **2a-n**

|                                                                                                                                           |           |
|-------------------------------------------------------------------------------------------------------------------------------------------|-----------|
| <i><sup>1</sup>H NMR spectrum of 6-phenyl-dihydropyrimidine-2,4(1H,3H)-dione <b>2a</b></i>                                                | <b>4</b>  |
| <i><sup>13</sup>C NMR spectrum of 6-phenyl-dihydropyrimidine-2,4(1H,3H)-dione <b>2a</b></i>                                               | <b>5</b>  |
| <i><sup>1</sup>H NMR spectrum of dihydro-6-(3'-(hexahydro-2'',6''-dioxopyrimidin-4''-yl)phenyl)pyrimidine-2,4(1H,3H)-dione <b>2b</b></i>  | <b>6</b>  |
| <i><sup>13</sup>C NMR spectrum of dihydro-6-(3'-(hexahydro-2'',6''-dioxopyrimidin-4''-yl)phenyl)pyrimidine-2,4(1H,3H)-dione <b>2b</b></i> | <b>7</b>  |
| <i><sup>1</sup>H NMR spectrum of 6-(anthracen-10'-yl)-dihydropyrimidine-2,4(1H,3H)-dione <b>2c</b></i>                                    | <b>8</b>  |
| <i><sup>13</sup>C NMR spectrum of 6-(anthracen-10'-yl)-dihydropyrimidine-2,4(1H,3H)-dione <b>2c</b></i>                                   | <b>9</b>  |
| <i><sup>1</sup>H NMR spectrum of 6-(4'-fluorophenyl)-dihydropyrimidine-2,4(1H,3H)-dione <b>2d</b></i>                                     | <b>10</b> |
| <i><sup>13</sup>C NMR spectrum of 6-(4'-fluorophenyl)-dihydropyrimidine-2,4(1H,3H)-dione <b>2d</b></i>                                    | <b>11</b> |
| <i><sup>1</sup>H NMR spectrum of 6-(2'-chlorophenyl)-dihydropyrimidine-2,4(1H,3H)-dione <b>2e</b></i>                                     | <b>12</b> |
| <i><sup>13</sup>C NMR spectrum of 6-(2'-chlorophenyl)-dihydropyrimidine-2,4(1H,3H)-dione <b>2e</b></i>                                    | <b>13</b> |
| <i><sup>1</sup>H NMR spectrum of 6-(4'-chlorophenyl)-dihydropyrimidine-2,4(1H,3H)-dione <b>2f</b></i>                                     | <b>14</b> |
| <i><sup>13</sup>C NMR spectrum of 6-(4'-chlorophenyl)-dihydropyrimidine-2,4(1H,3H)-dione <b>2f</b></i>                                    | <b>15</b> |
| <i><sup>1</sup>H NMR spectrum of 6-(4'-nitrophenyl)-dihydropyrimidine-2,4(1H,3H)-dione <b>2g</b></i>                                      | <b>16</b> |
| <i><sup>13</sup>C NMR spectrum of 6-(4'-nitrophenyl)-dihydropyrimidine-2,4(1H,3H)-dione <b>2g</b></i>                                     | <b>17</b> |
| <i><sup>1</sup>H NMR spectrum of 6-(4'-benzyloxyphenyl)-dihydropyrimidine-2,4(1H,3H)-dione <b>2h</b></i>                                  | <b>18</b> |
| <i><sup>13</sup>C NMR spectrum of 6-(4'-benzyloxyphenyl)-dihydropyrimidine-2,4(1H,3H)-dione <b>2h</b></i>                                 | <b>19</b> |
| <i><sup>1</sup>H NMR spectrum of 6-(4'-(4''-bromobenzyloxy)phenyl)-dihydropyrimidine-2,4(1H,3H)-dione <b>2i</b></i>                       | <b>20</b> |
| <i><sup>13</sup>C NMR spectrum of 6-(4'-(4''-bromobenzyloxy)phenyl)-dihydropyrimidine-2,4(1H,3H)-dione <b>2i</b></i>                      | <b>21</b> |
| <i><sup>1</sup>H NMR spectrum of dihydro-6-(4'-methoxyphenyl)pyrimidine-2,4(1H,3H)-dione <b>2j</b></i>                                    | <b>22</b> |
| <i><sup>13</sup>C NMR spectrum of dihydro-6-(4'-methoxyphenyl)pyrimidine-2,4(1H,3H)-dione <b>2j</b></i>                                   | <b>23</b> |
| <i><sup>1</sup>H NMR spectrum of 6-(3',4'-dimethoxyphenyl)-dihydropyrimidine-2,4(1H,3H)-dione <b>2k</b></i>                               | <b>24</b> |
| <i><sup>13</sup>C NMR spectrum of 6-(3',4'-dimethoxyphenyl)-dihydropyrimidine-2,4(1H,3H)-dione <b>2k</b></i>                              | <b>25</b> |

|                                                                                                                           |           |
|---------------------------------------------------------------------------------------------------------------------------|-----------|
| <i><sup>1</sup>H NMR spectrum of dihydro-6-(3',4',5'-trimethoxyphenyl)pyrimidine-2,4(1H,3H)-dione 2l</i>                  | <b>26</b> |
| <i><sup>13</sup>C NMR spectrum of dihydro-6-(3',4',5'-trimethoxyphenyl)pyrimidine-2,4(1H,3H)-dione 2l</i>                 | <b>27</b> |
| <i><sup>1</sup>H NMR spectrum of 6-(4'-ethoxy-3'-methoxyphenyl)-dihydropyrimidine-2,4(1H,3H)-dione 2m</i>                 | <b>28</b> |
| <i><sup>13</sup>C NMR spectrum of 6-(4'-ethoxy-3'-methoxyphenyl)-dihydropyrimidine-2,4(1H,3H)-dione 2m</i>                | <b>29</b> |
| <i><sup>1</sup>H NMR spectrum of 6-(4'-propoxy-3'-methoxyphenyl)-dihydropyrimidine-2,4(1H,3H)-dione 2n</i>                | <b>30</b> |
| <i><sup>13</sup>C NMR spectrum of 6-(4'-propoxy-3'-methoxyphenyl)-dihydropyrimidine-2,4(1H,3H)-dione 2n</i>               | <b>31</b> |
| <i><sup>1</sup>H NMR spectrum of 6-(4'-butoxy-3'-methoxyphenyl)-dihydropyrimidine-2,4(1H,3H)-dione 2o</i>                 | <b>32</b> |
| <i><sup>13</sup>C NMR spectrum of 6-(4'-butoxy-3'-methoxyphenyl)-dihydropyrimidine-2,4(1H,3H)-dione 2o</i>                | <b>33</b> |
| <i><sup>1</sup>H NMR spectrum of 6-(4'-benzyloxy-3'-methoxyphenyl)-dihydropyrimidine-2,4(1H,3H)-dione 2p</i>              | <b>34</b> |
| <i><sup>13</sup>C NMR spectrum of 6-(4'-benzyloxy-3'-methoxyphenyl)-dihydropyrimidine-2,4(1H,3H)-dione 2p</i>             | <b>35</b> |
| <i><sup>1</sup>H NMR spectrum of 6-(4'-(3''-methylbenzyloxy)-3'-methoxyphenyl)-dihydropyrimidine-2,4(1H,3H)-dione 2q</i>  | <b>36</b> |
| <i><sup>13</sup>C NMR spectrum of 6-(4'-(3''-methylbenzyloxy)-3'-methoxyphenyl)-dihydropyrimidine-2,4(1H,3H)-dione 2q</i> | <b>37</b> |
| <i><sup>1</sup>H NMR spectrum of 6-(4'-(4''-methylbenzyloxy)-3'-methoxyphenyl)-dihydropyrimidine-2,4(1H,3H)-dione 2r</i>  | <b>38</b> |
| <i><sup>13</sup>C NMR spectrum of 6-(4'-(4''-methylbenzyloxy)-3'-methoxyphenyl)-dihydropyrimidine-2,4(1H,3H)-dione 2r</i> | <b>39</b> |
| <i><sup>1</sup>H NMR spectrum of 6-(4'-acetoxy-3'-methoxyphenyl)-dihydropyrimidine-2,4(1H,3H)-dione 2s</i>                | <b>40</b> |
| <i><sup>13</sup>C NMR spectrum of 6-(4'-acetoxy-3'-methoxyphenyl)-dihydropyrimidine-2,4(1H,3H)-dione 2s</i>               | <b>41</b> |

6-phenyl-dihydropyrimidine-2,4(1*H*,3*H*)-dione **2a**

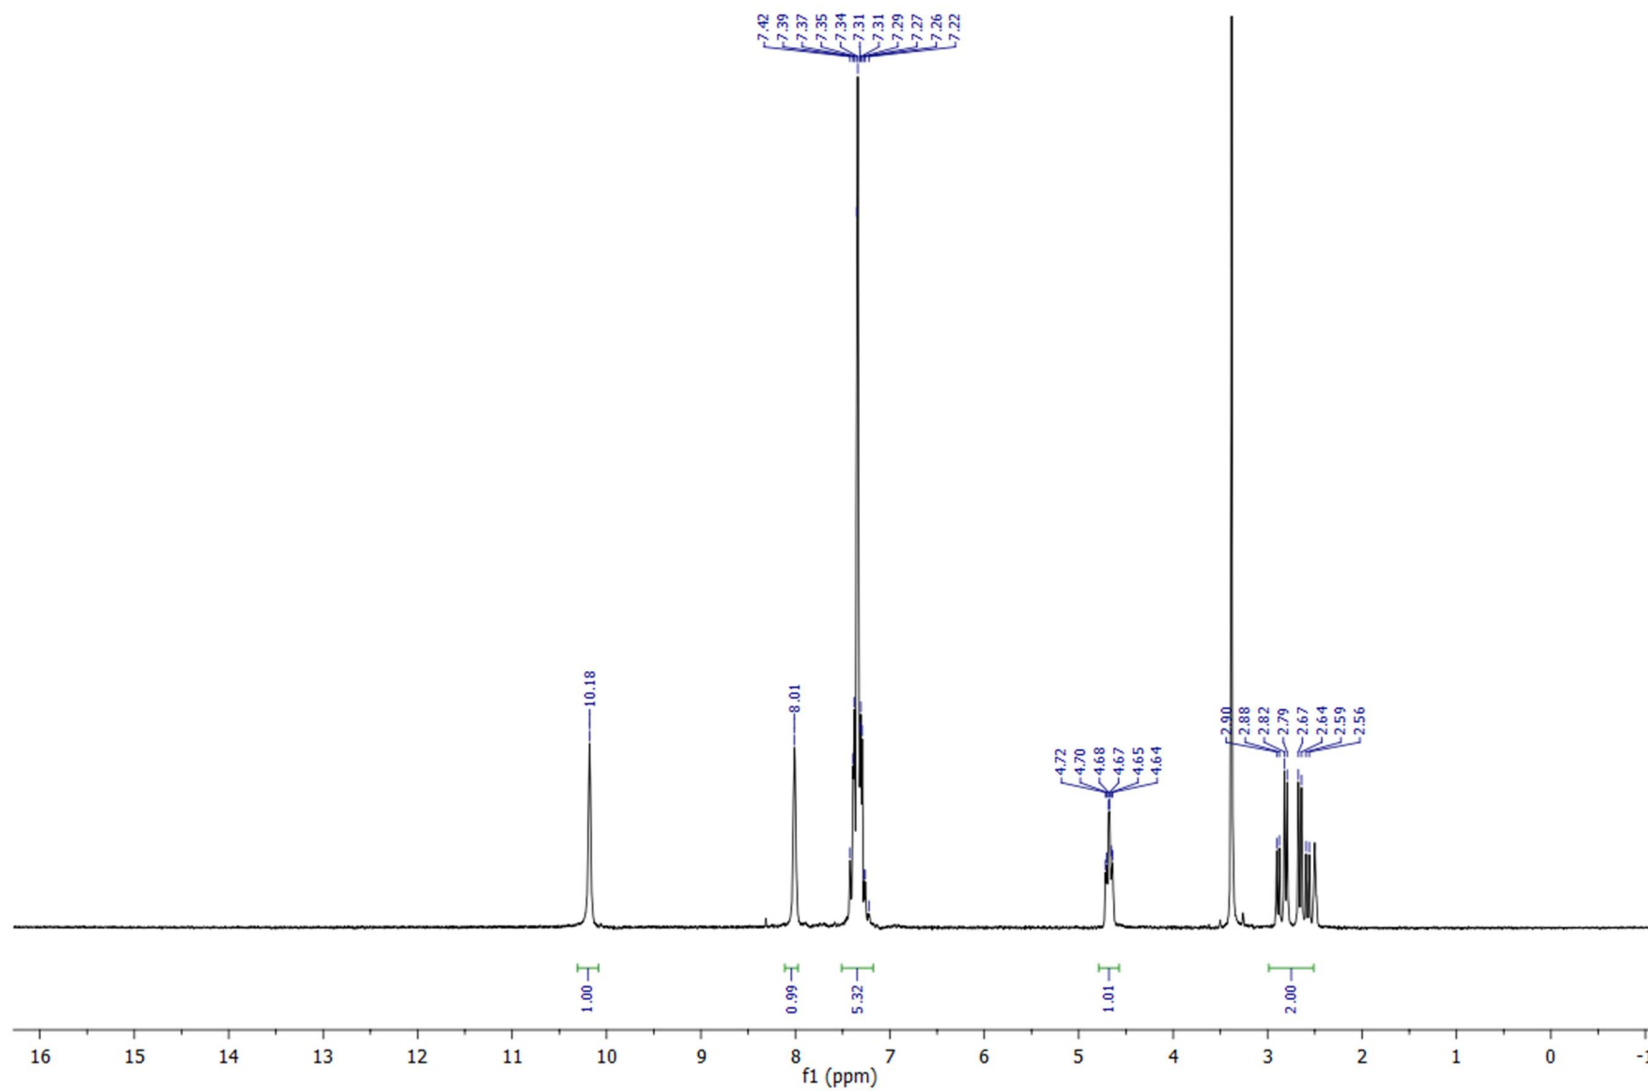

Figure S1. <sup>1</sup>H NMR spectrum of **2a**

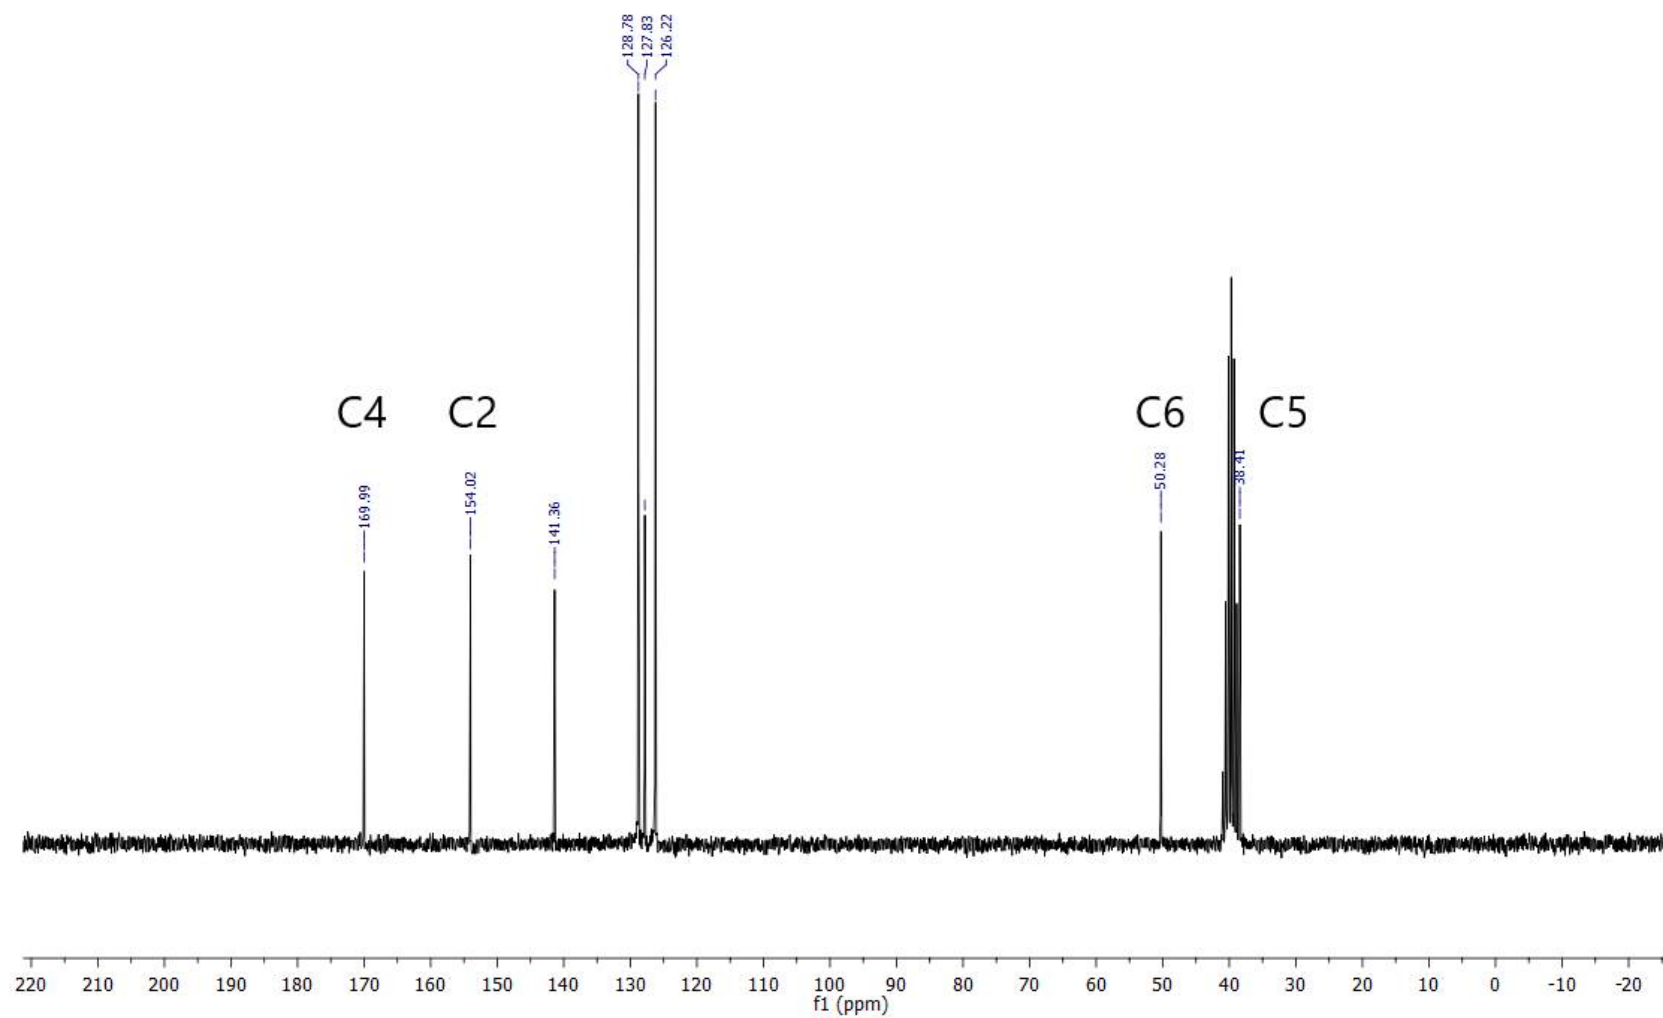

Figure S2.  $^{13}\text{C}$  NMR spectrum of **2a**

dihydro-6-(3'-(hexahydro-2'',6''-dioxypyrimidin-4''-yl)phenyl)pyrimidine-2,4(1H,3H)-dione **2b**

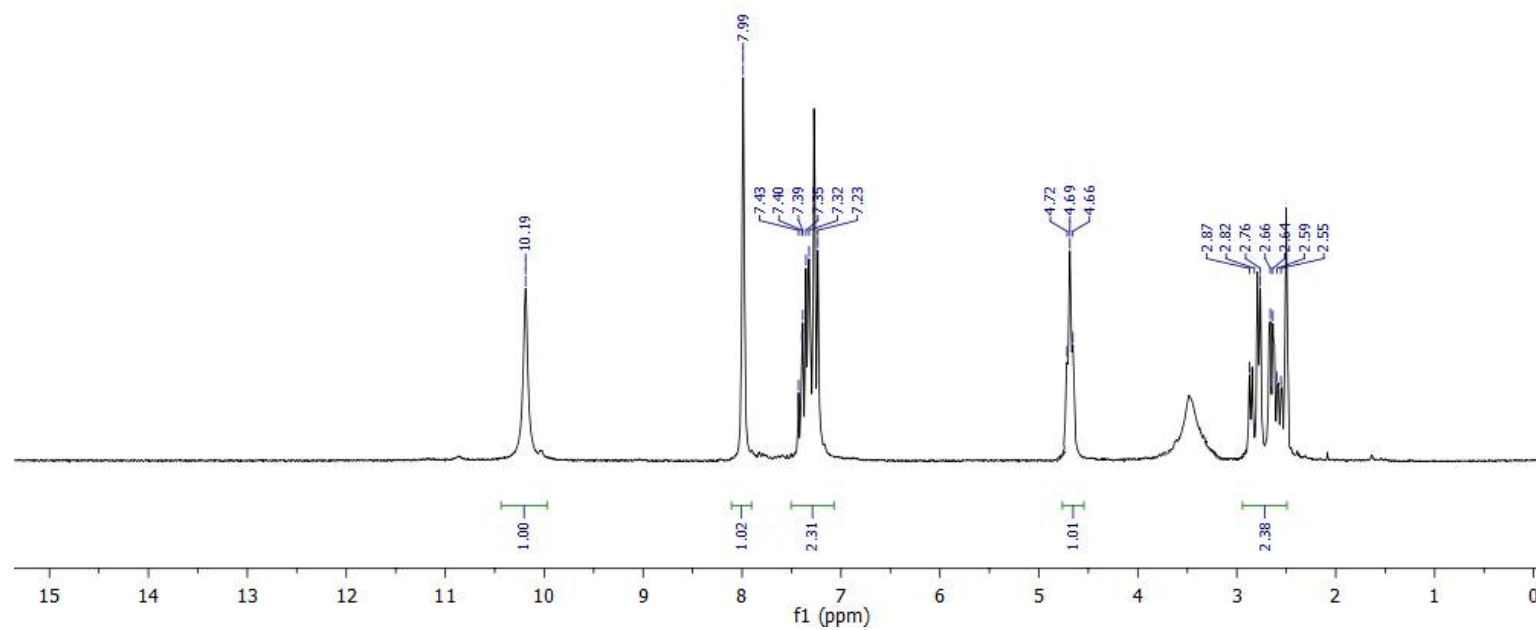

Figure S3. <sup>1</sup>H NMR spectrum of **2b**

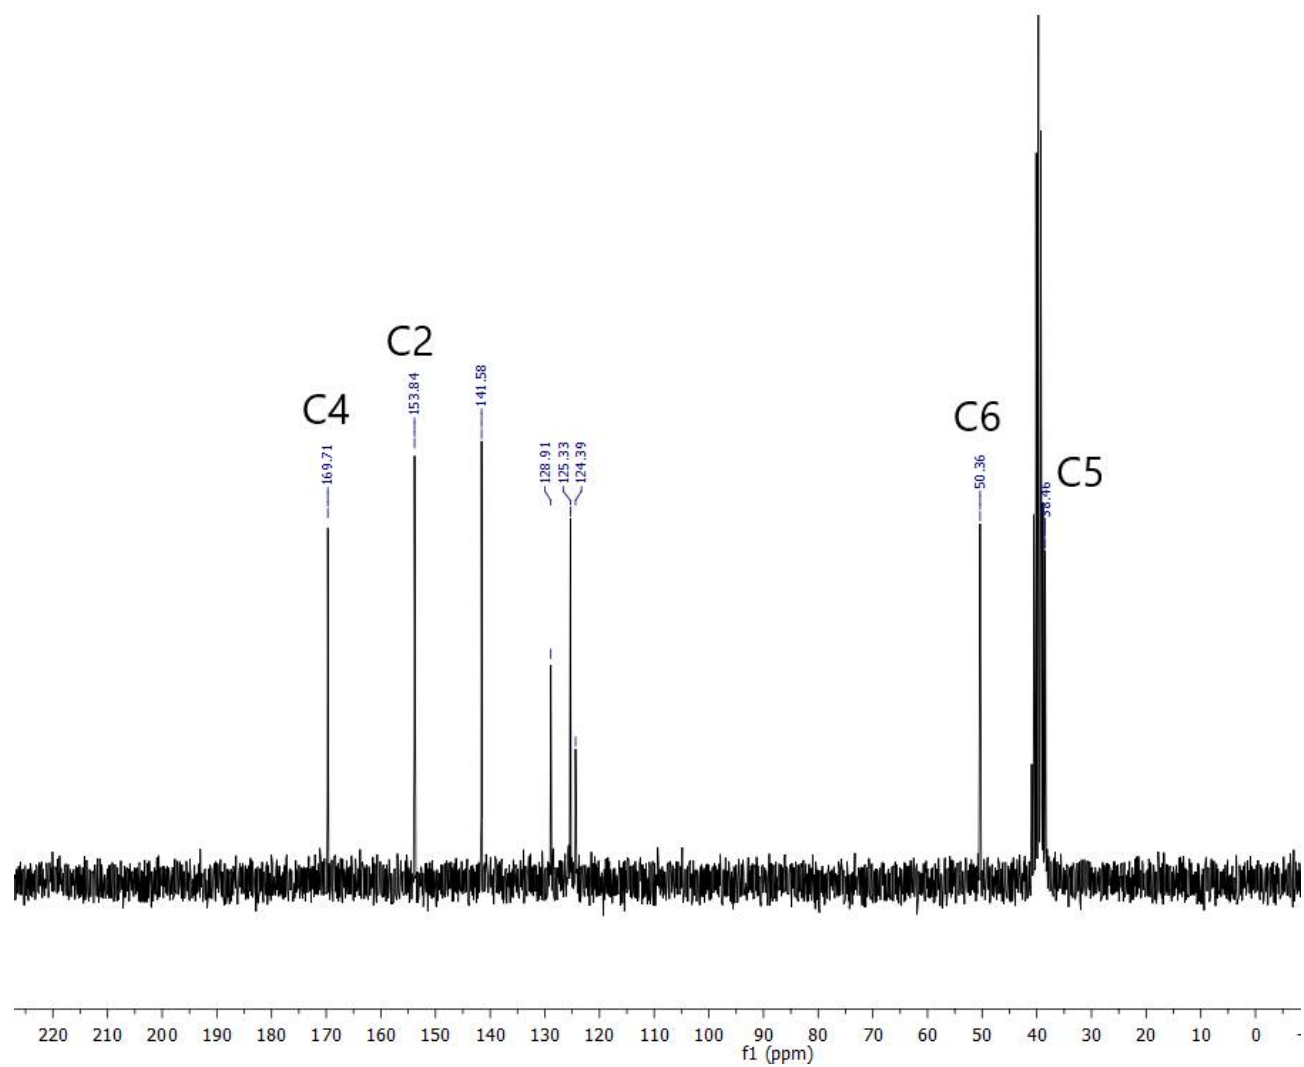

**Figure S4.**  $^{13}\text{C}$  NMR spectrum of **2b**

6-(anthracen-10'-yl)-dihydropyrimidine-2,4(1*H*,3*H*)-dione **2c**

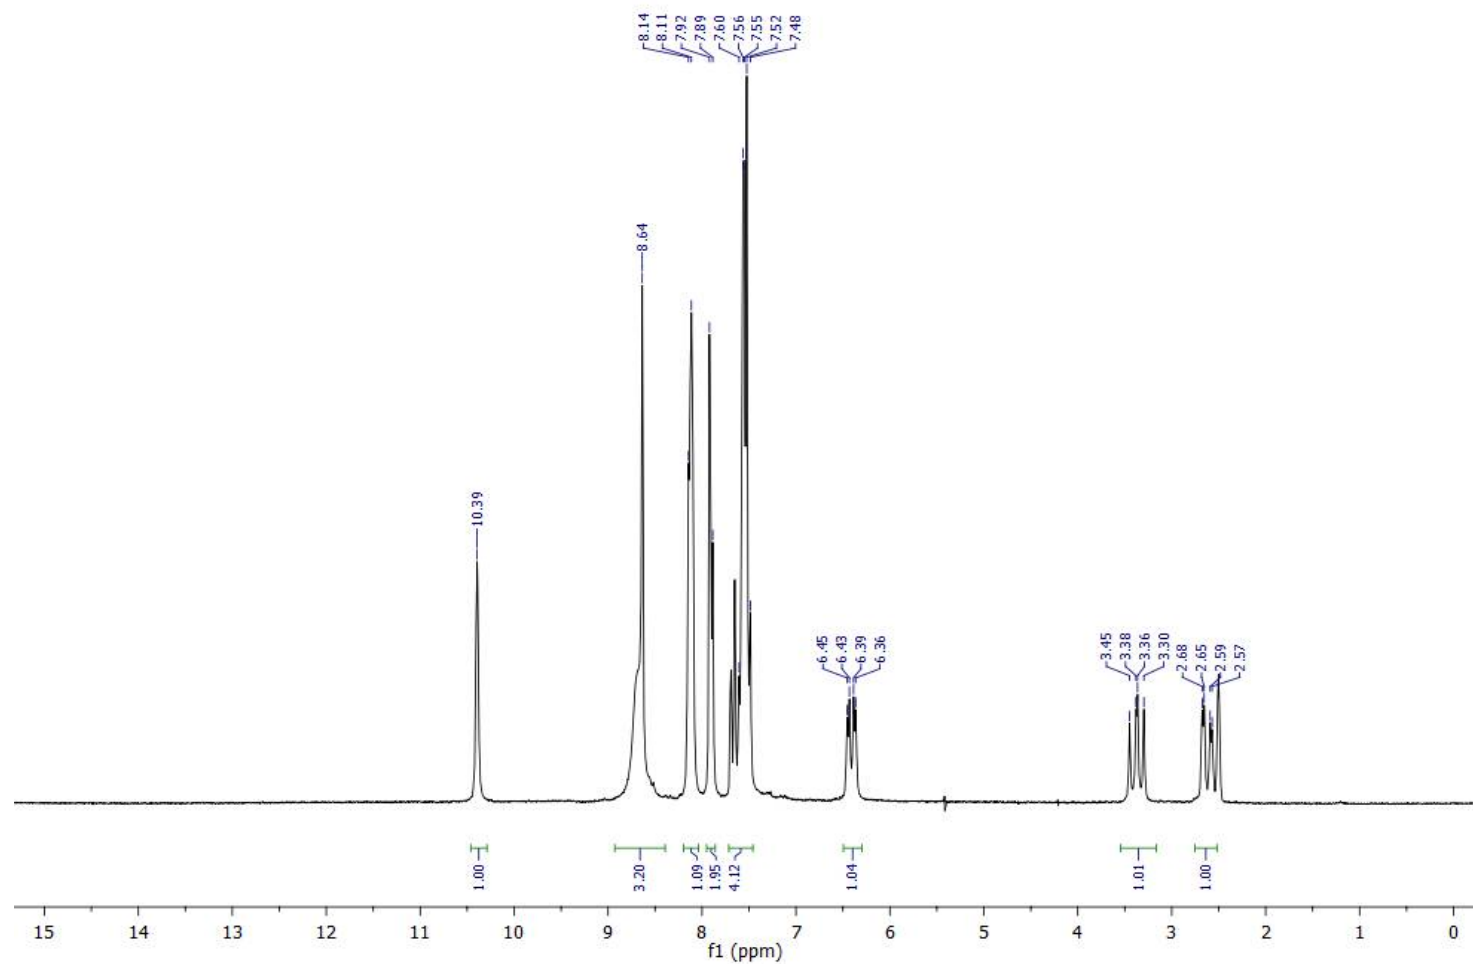

**Figure S5.** <sup>1</sup>H NMR spectrum of **2c** ( aromatic protons in range 8.4-8.9 ppm originated from m-chlorobenzoic acid)



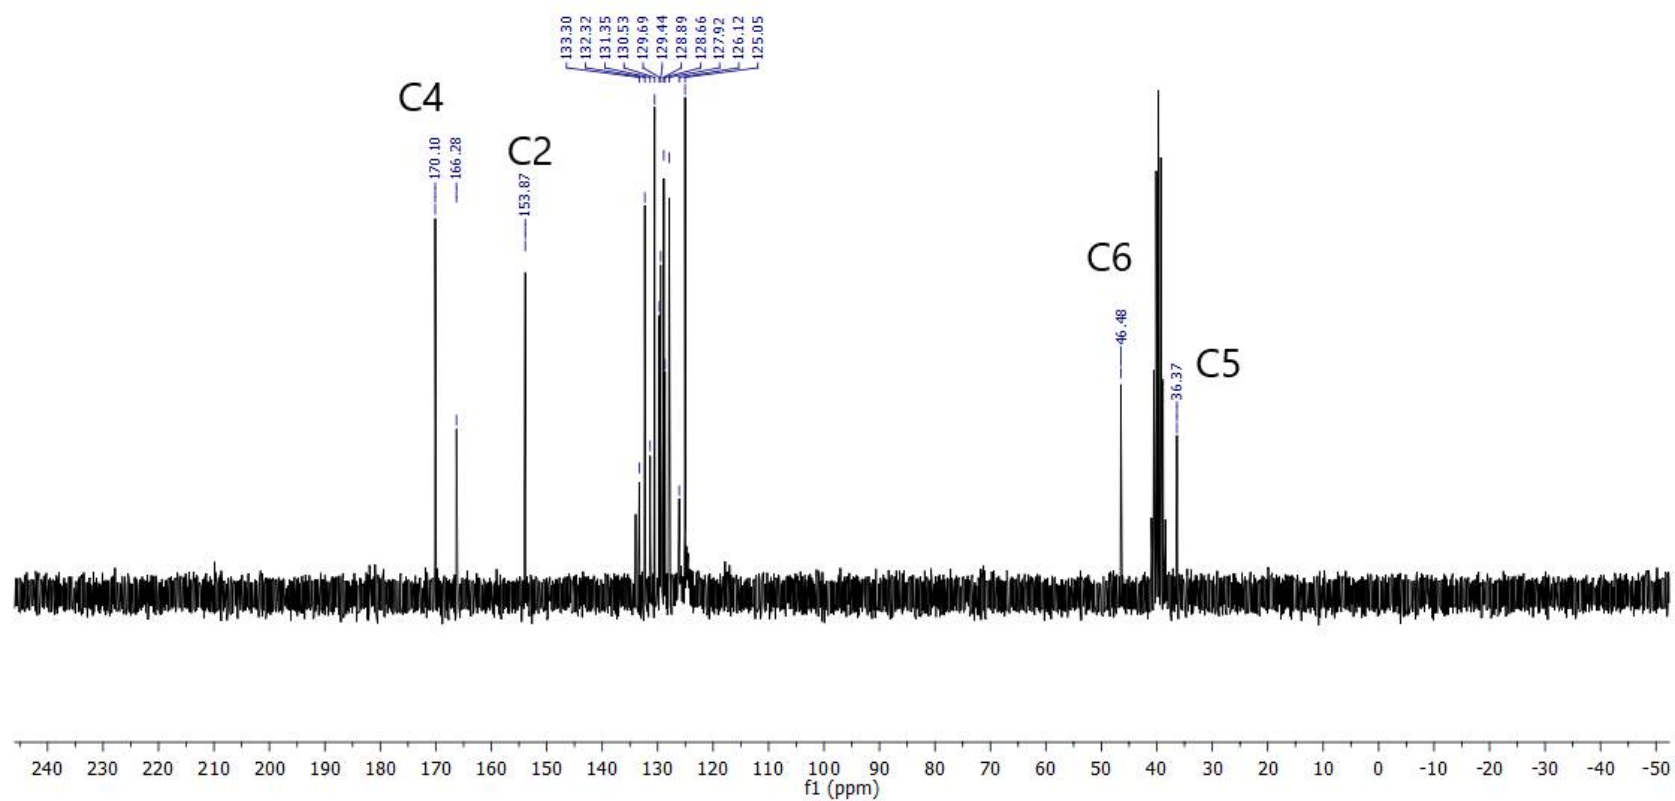

**Figure S6.**  $^{13}\text{C}$  NMR spectrum of **2c** [(carbonyl (COOH) at 166.3 ppm originated from m-chlorobenzoic acid)]

6-(4'-fluorophenyl)-dihydropyrimidine-2,4(1*H*,3*H*)-dione **2d**

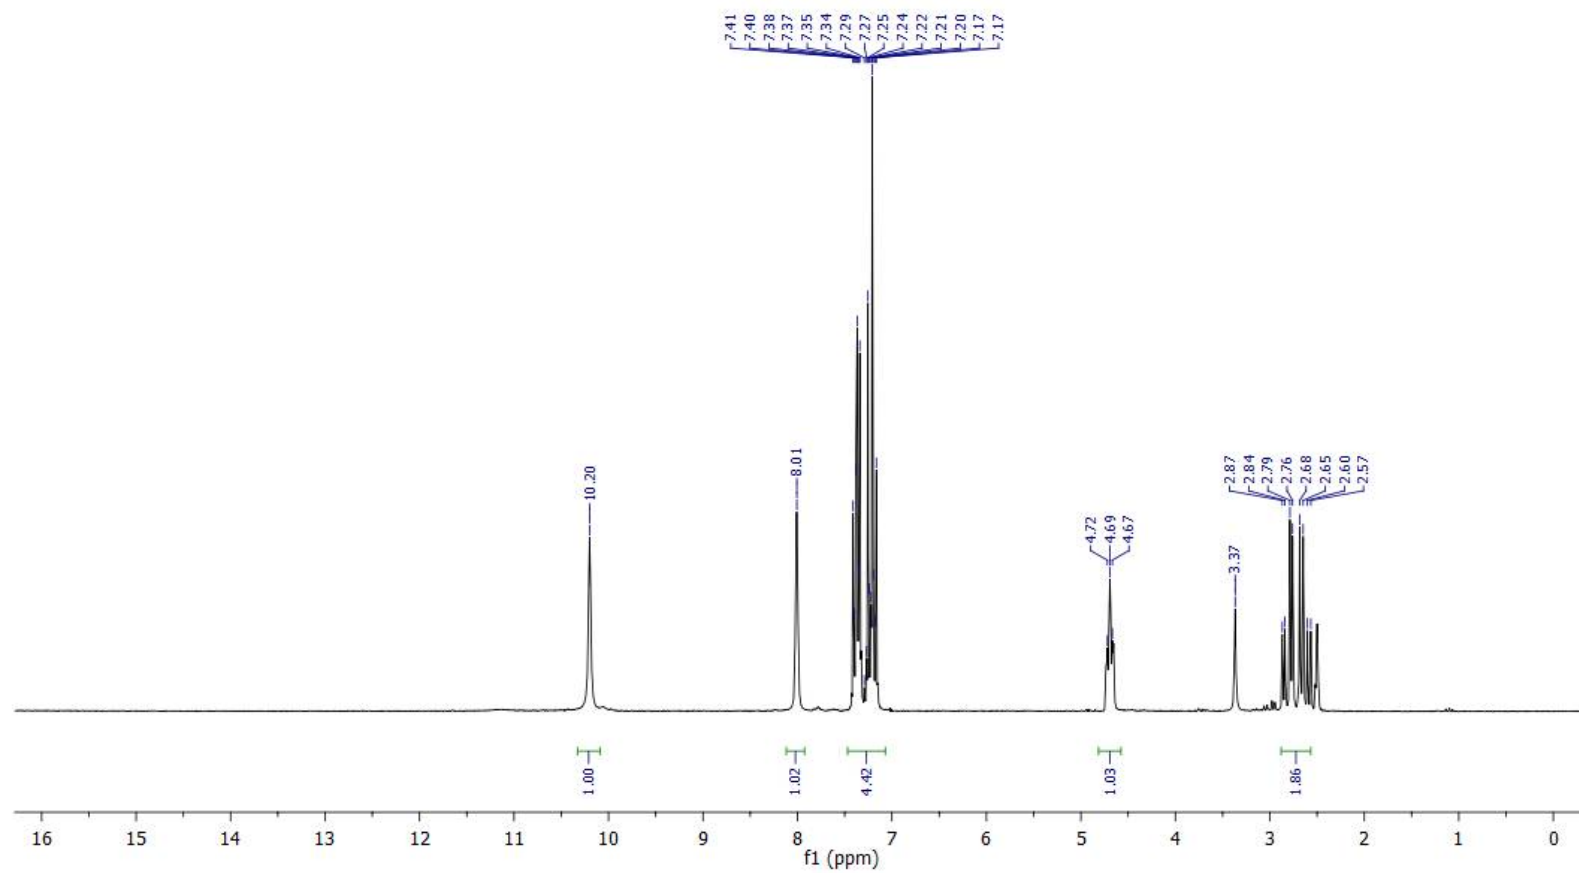

Figure S7. <sup>1</sup>H NMR spectrum of **2d**

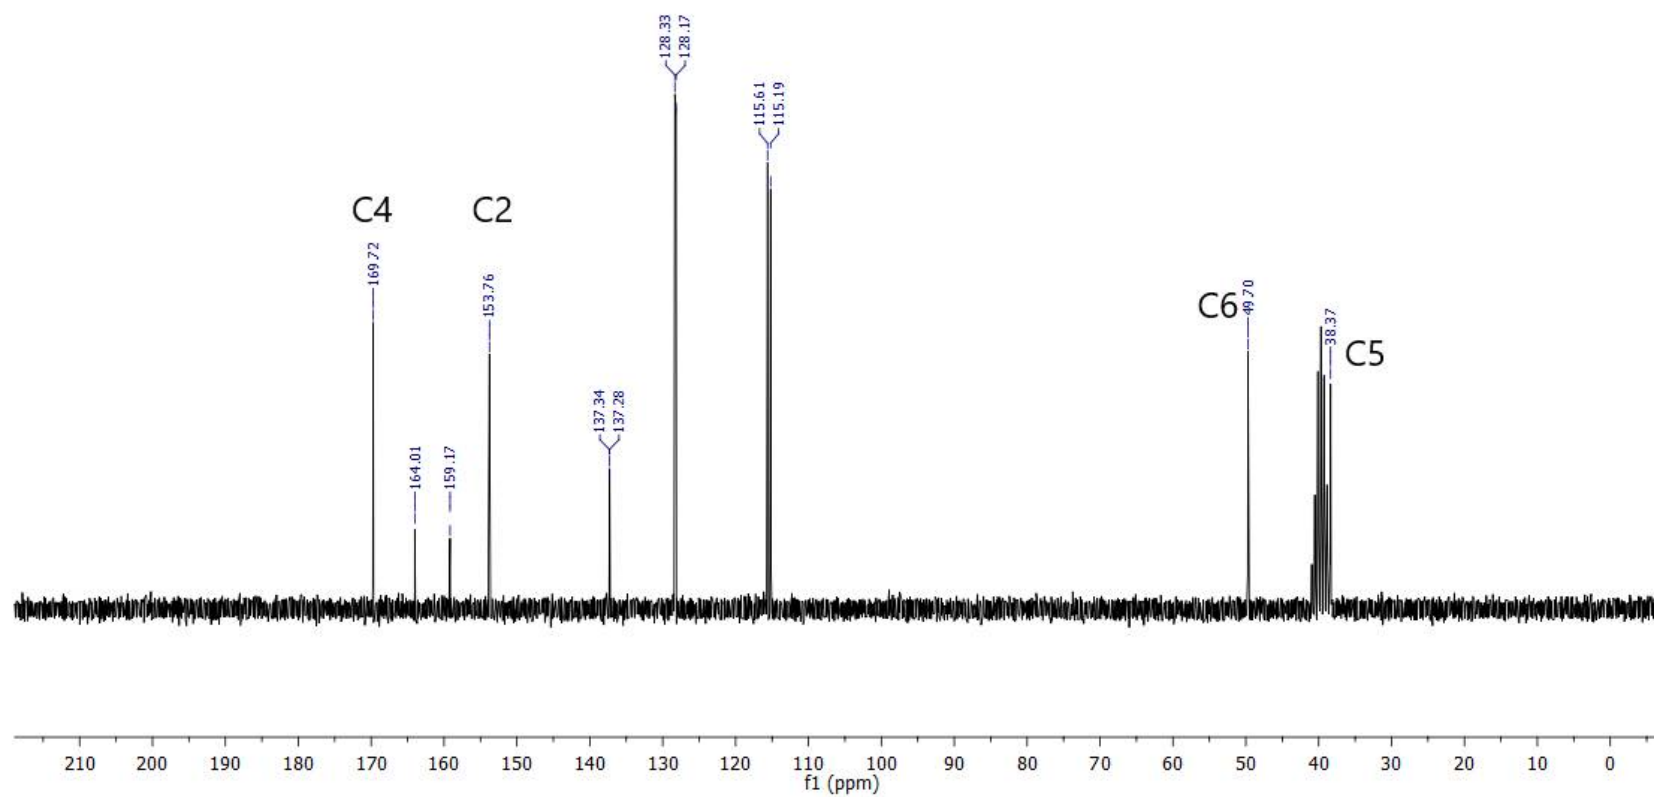

**Figure S8.**  $^{13}\text{C}$  NMR spectrum of **2d**

6-(2'-chlorophenyl)-dihydropyrimidine-2,4(1*H*,3*H*)-dione **2e**

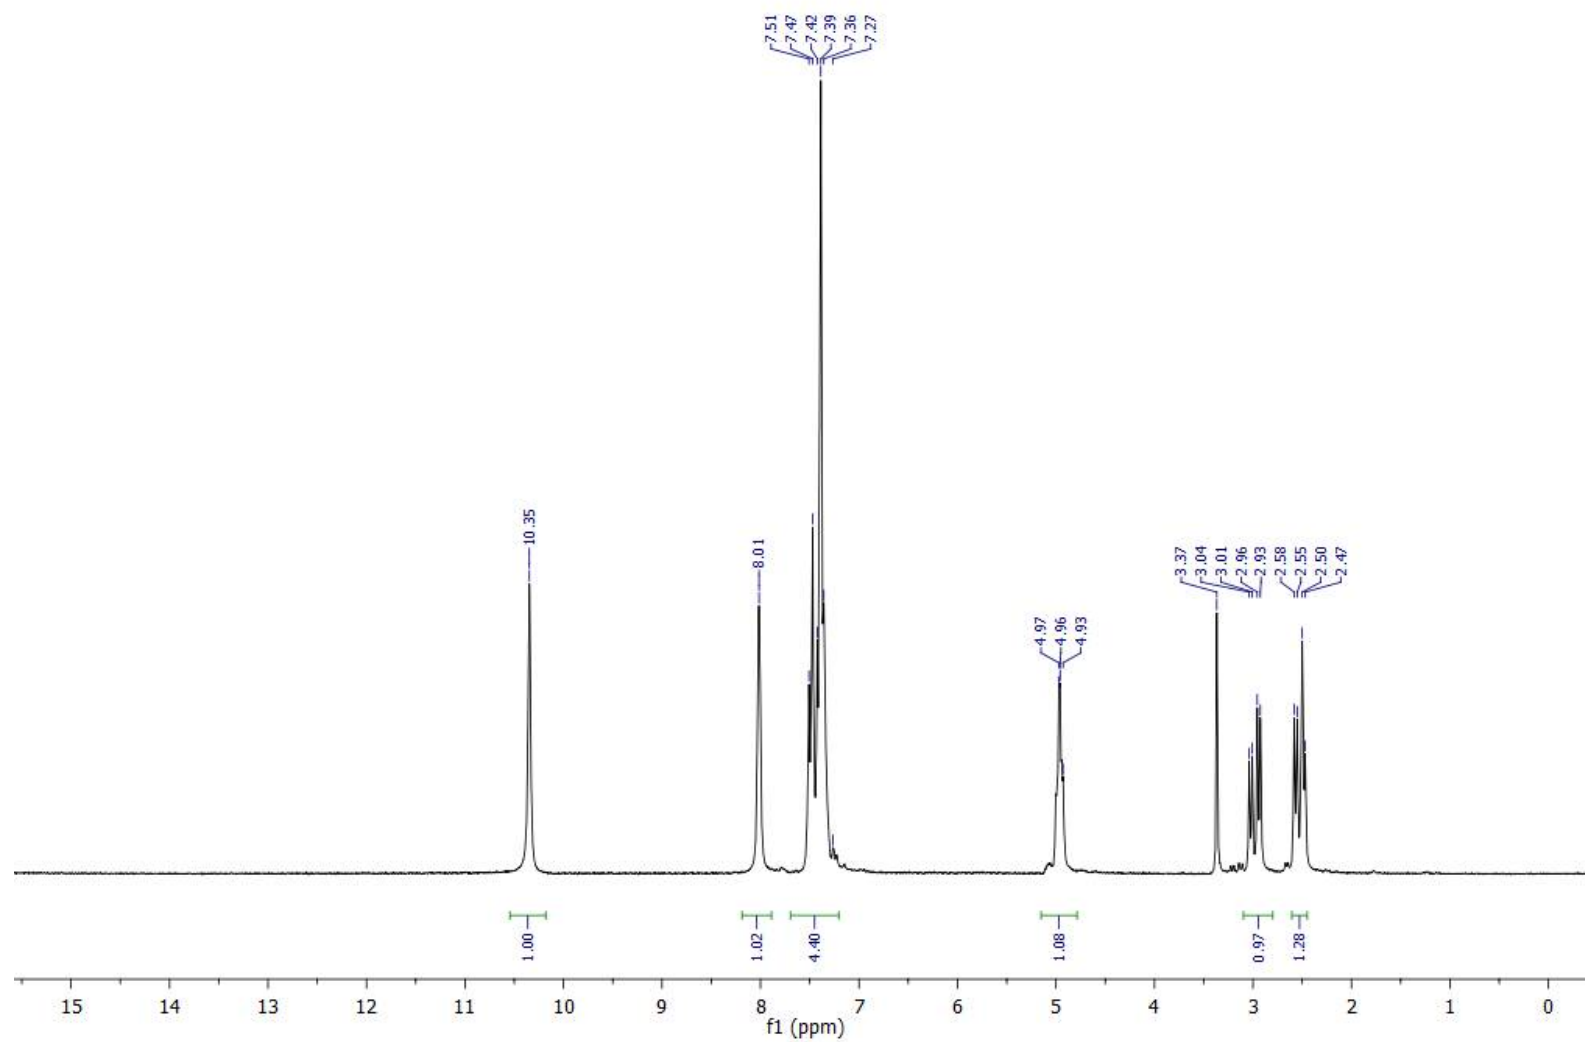

Figure S9. <sup>1</sup>H NMR spectrum of **2e**

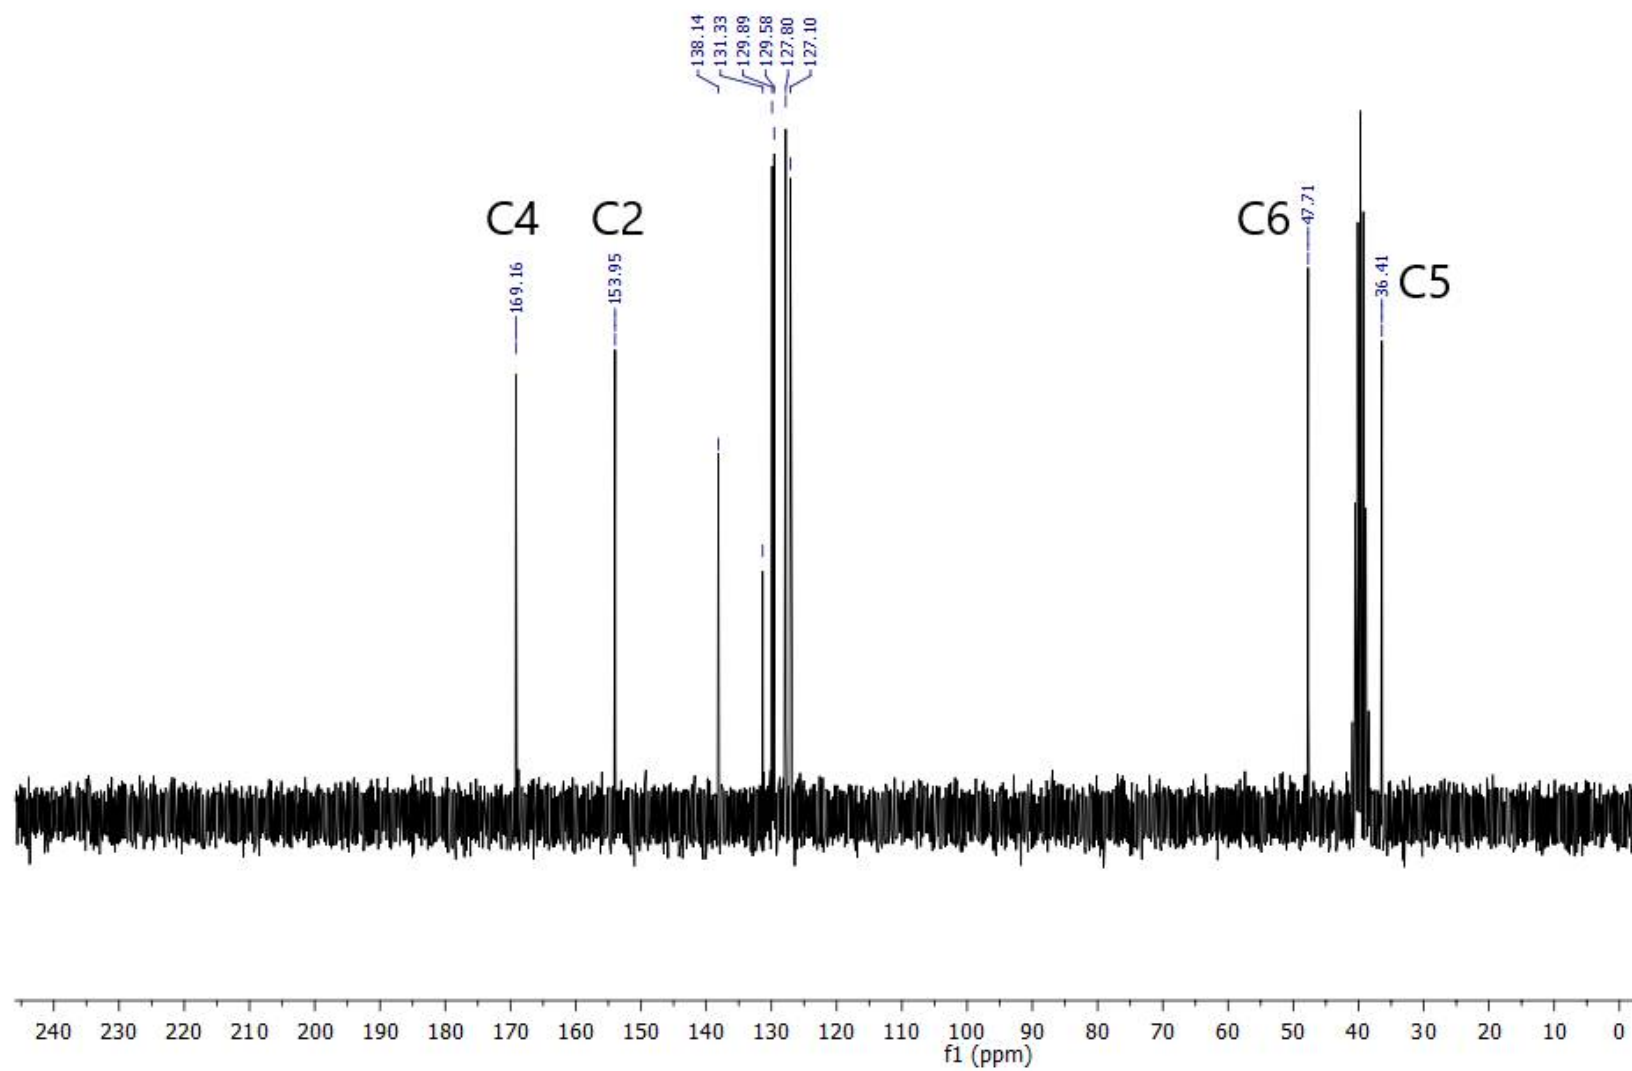

Figure S10. <sup>13</sup>C NMR spectrum of 2e

6-(4'-chlorophenyl)-dihydropyrimidine-2,4(1*H*,3*H*)-dione **2f**

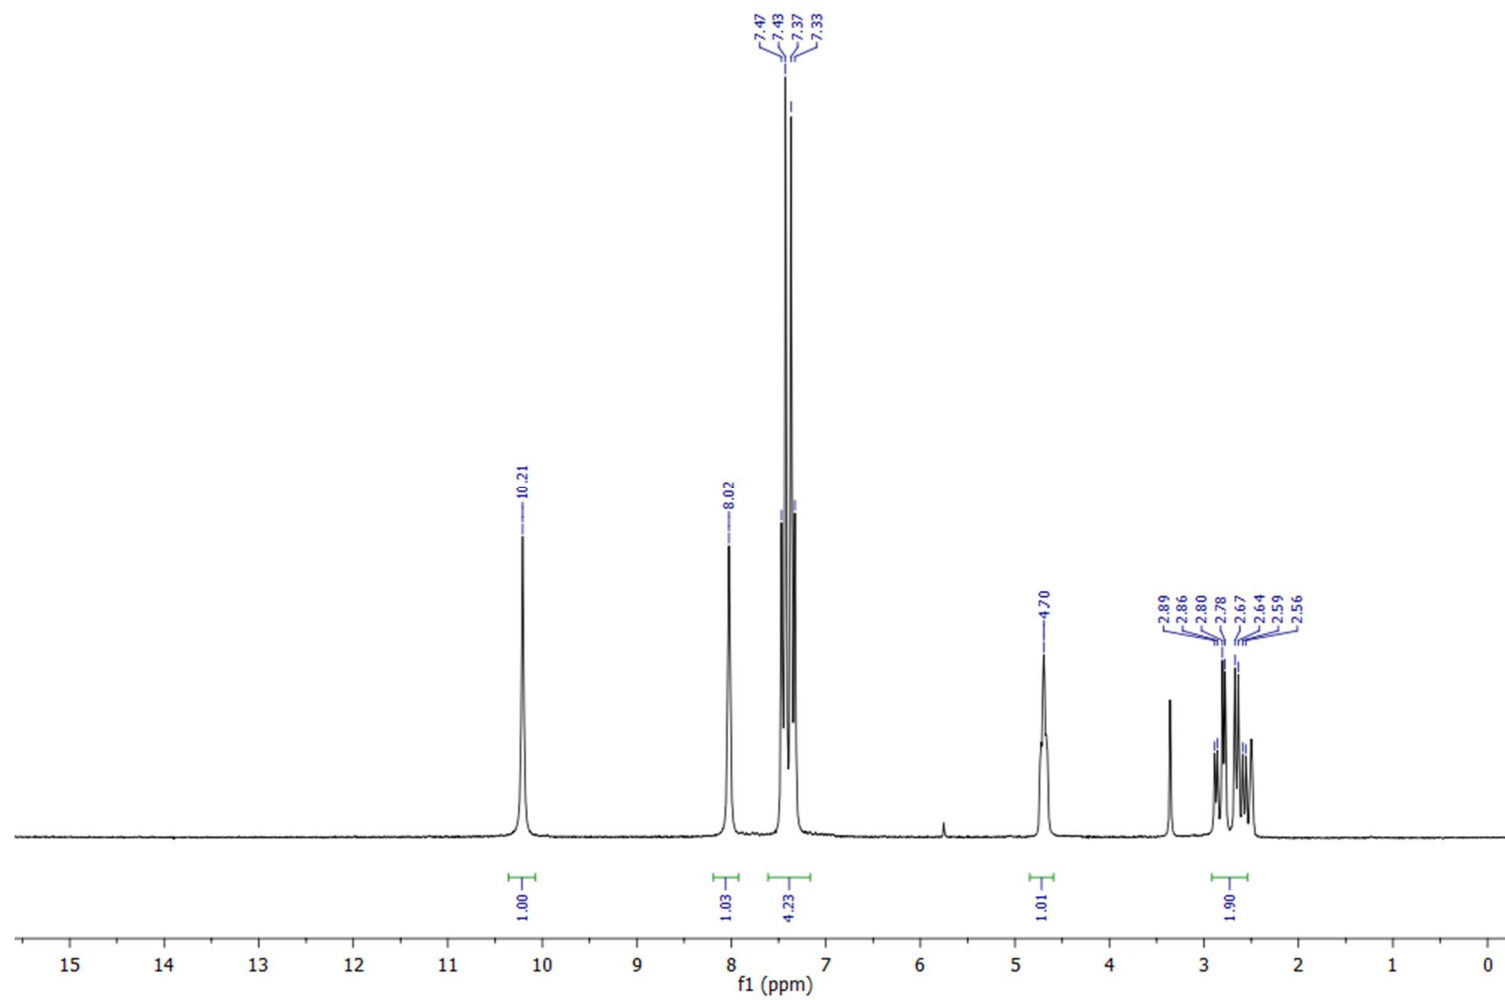

Figure S11. <sup>1</sup>H NMR spectrum of **2f**

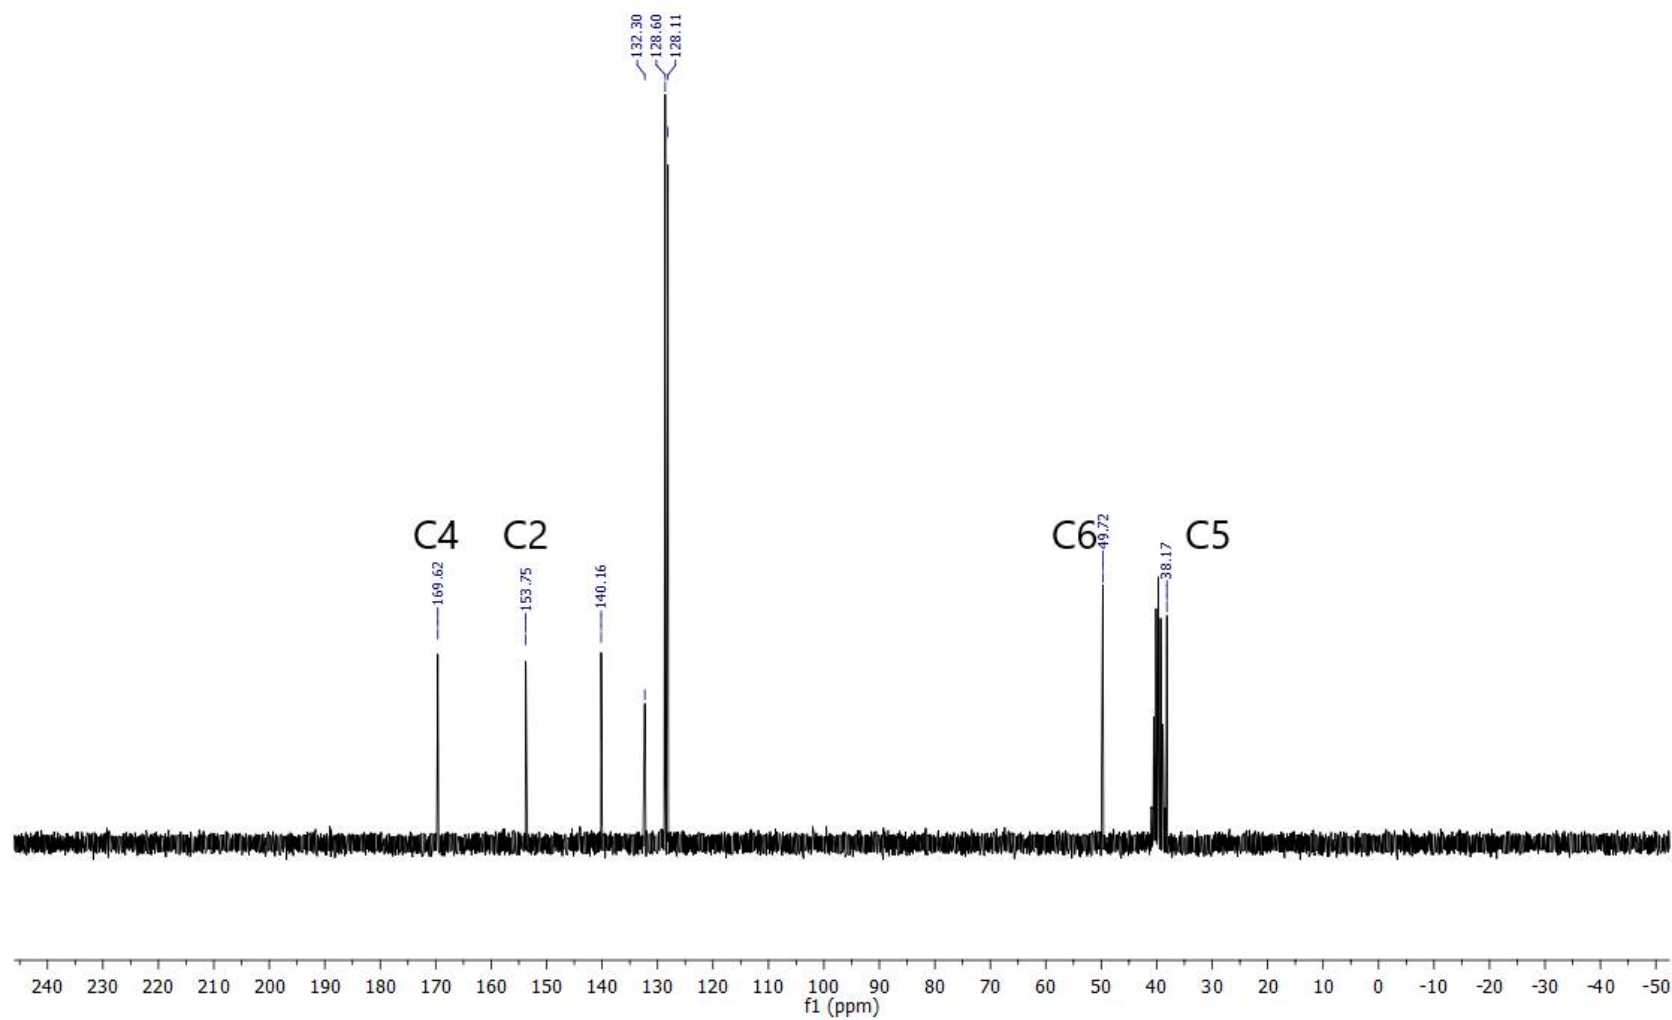

Figure S12.  $^{13}\text{C}$  NMR spectrum of 2f

6-(4'-nitrophenyl)-dihydropyrimidine-2,4(1*H*,3*H*)-dione **2g**

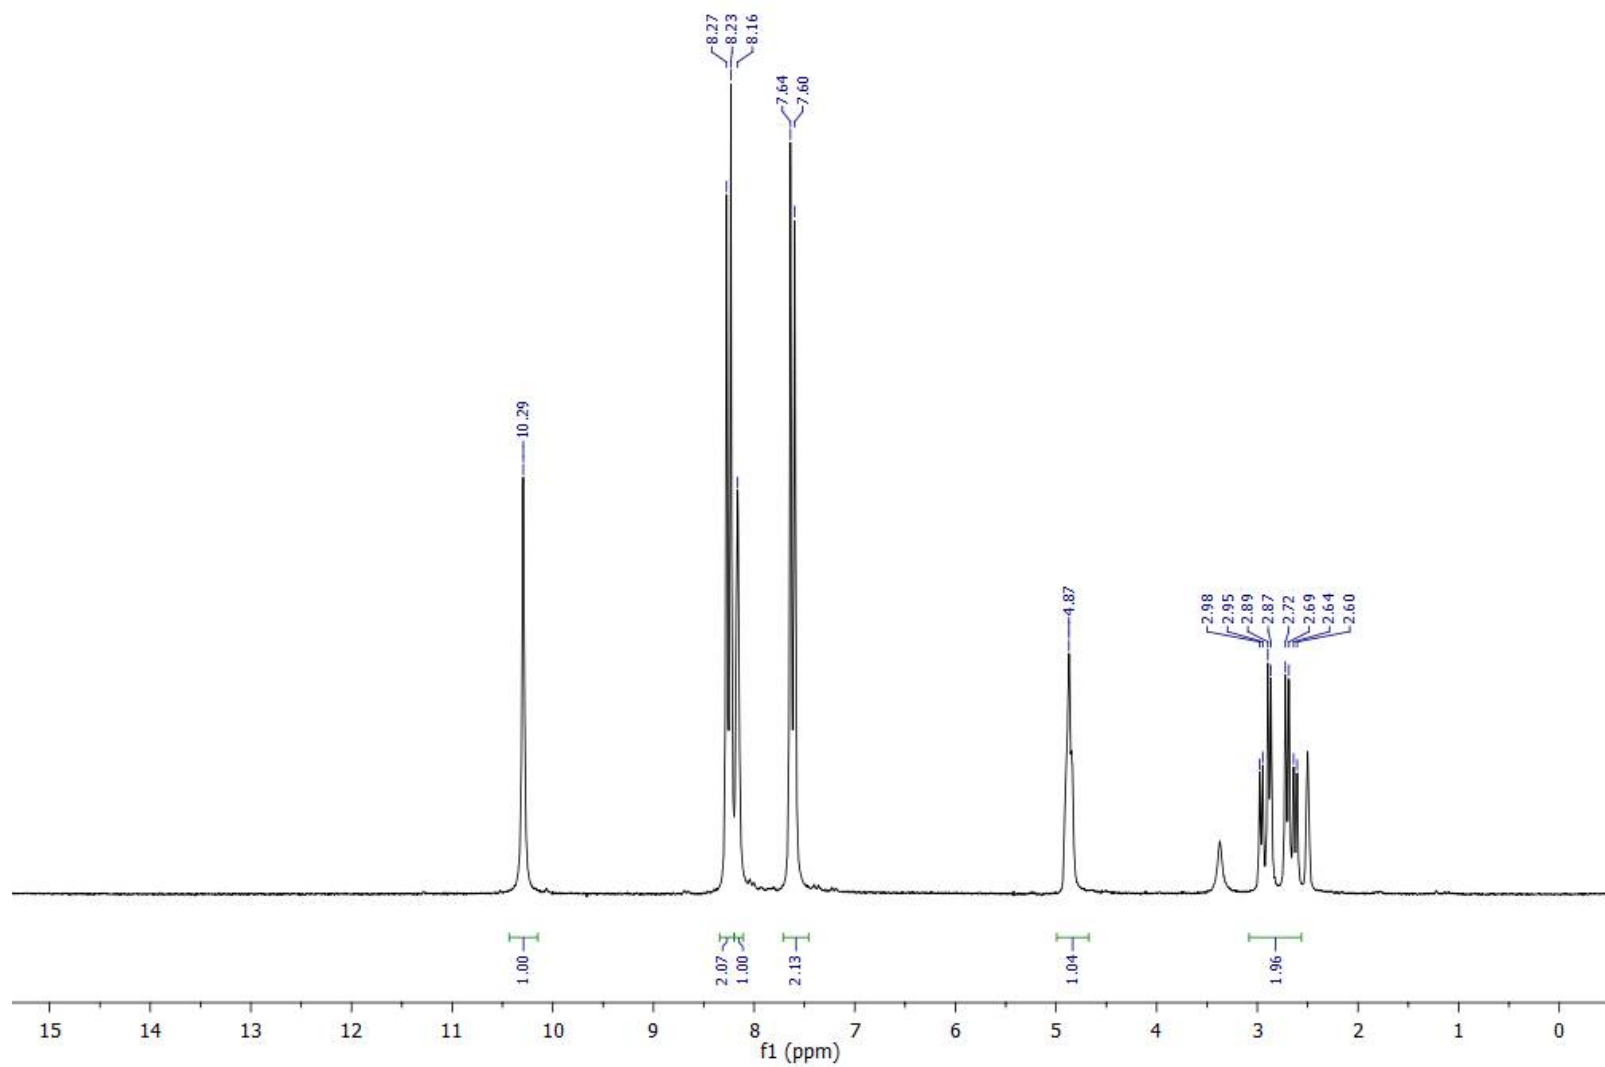

Figure S13. <sup>1</sup>H NMR spectrum of **2g**



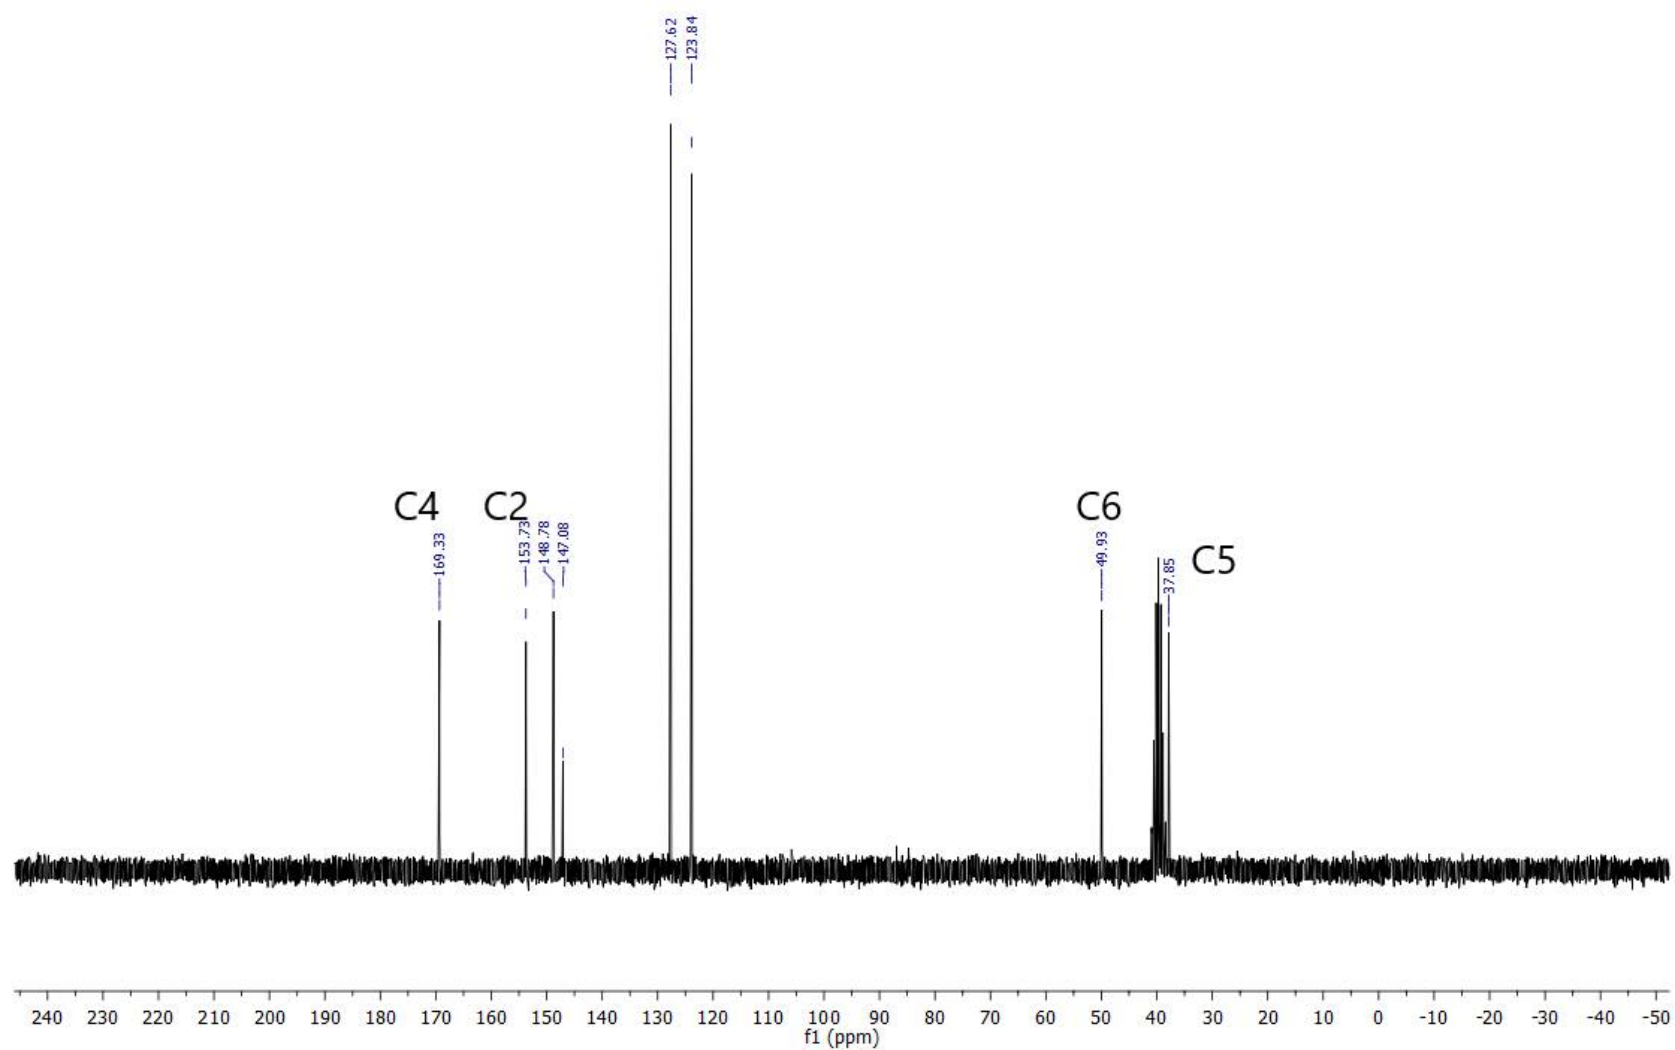

Figure S14.  $^{13}\text{C}$  NMR spectrum of 2g

6-(4'-benzyloxyphenyl)-dihydropyrimidine-2,4(1*H*,3*H*)-dione **2h**

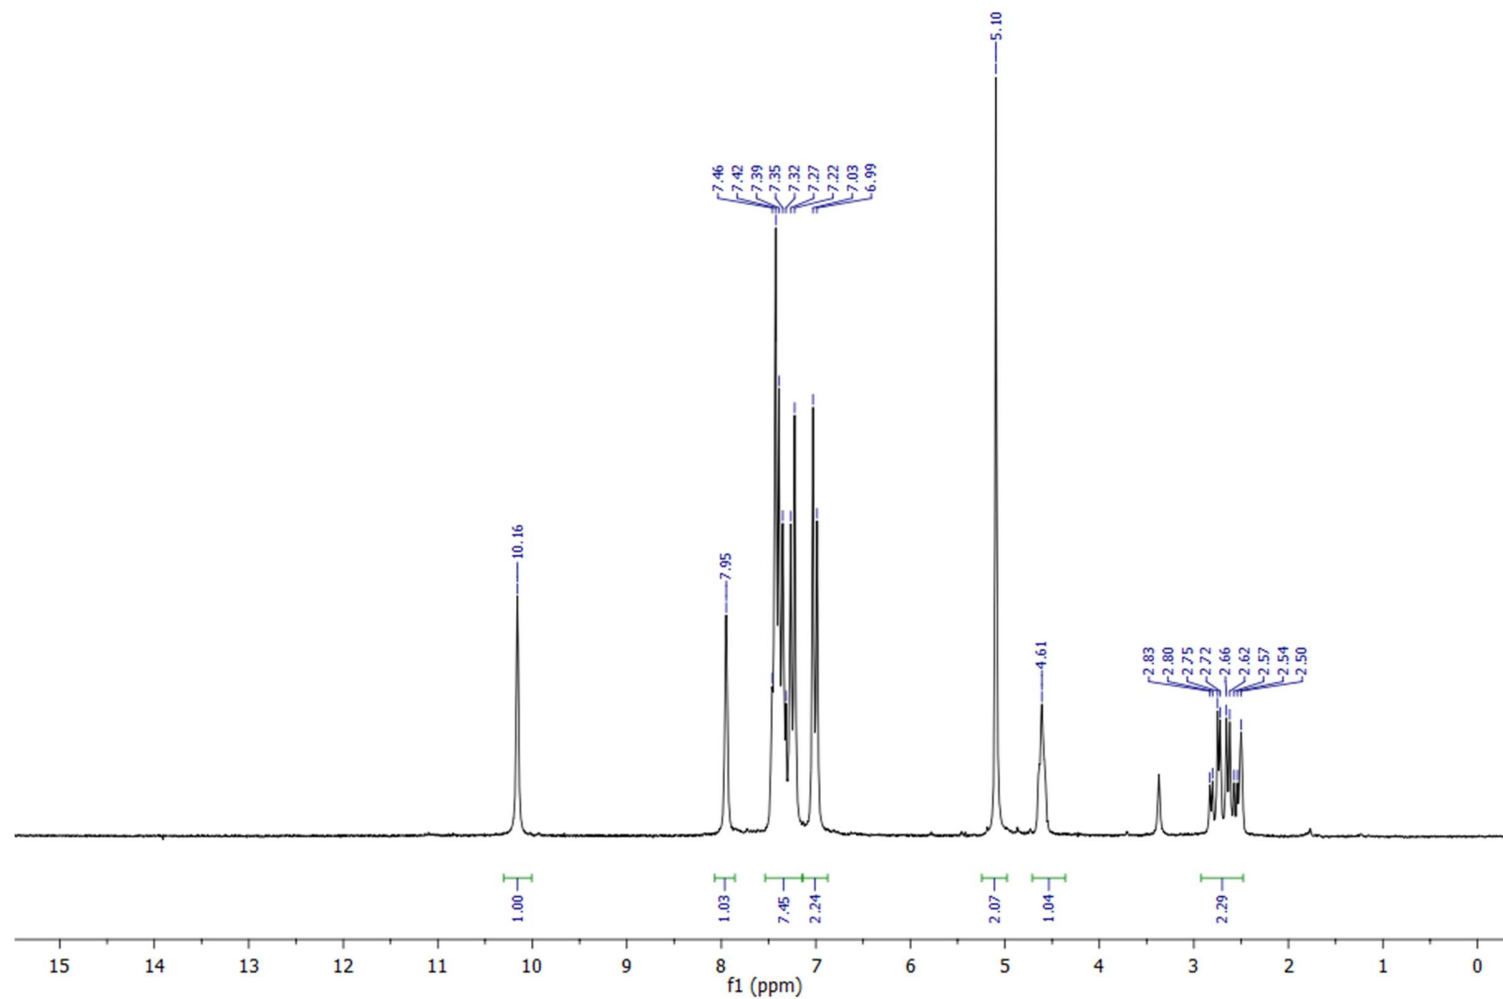

Figure S15. <sup>1</sup>H NMR spectrum of **2h**

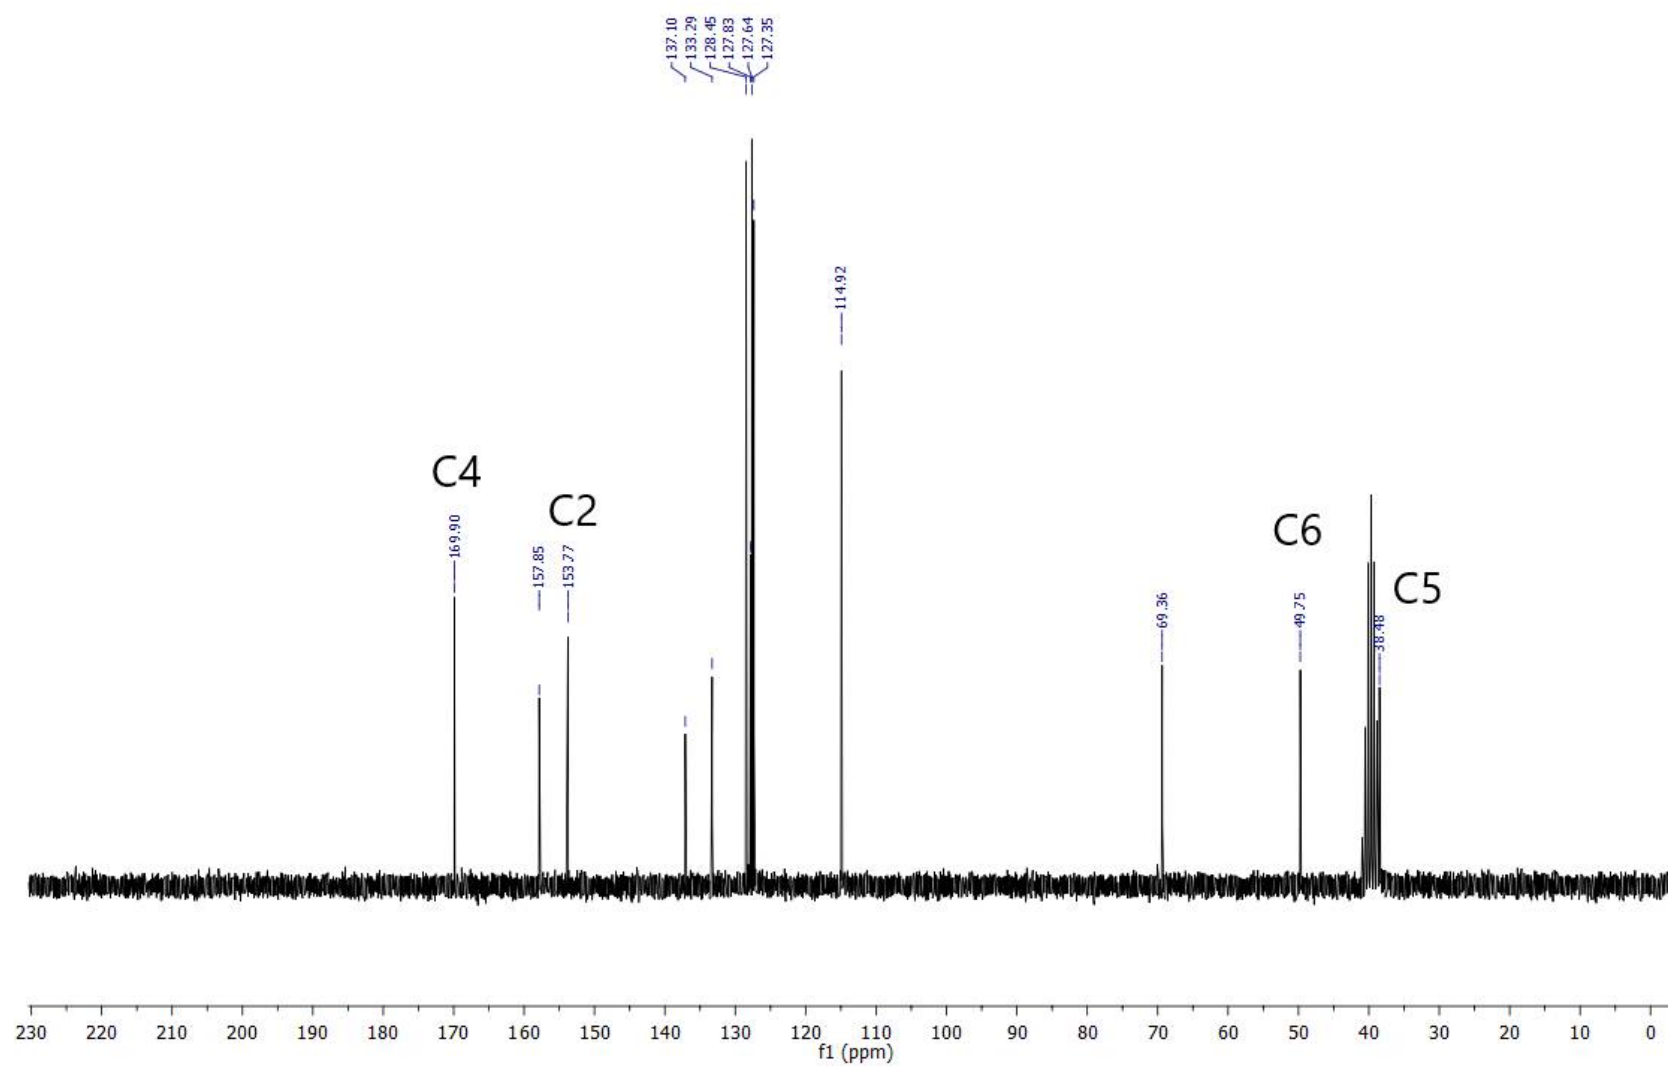

Figure S16. <sup>13</sup>C NMR spectrum of 2h

6-(4'-(4''-bromobenzyloxy)phenyl)-dihydropyrimidine-2,4(1*H*,3*H*)-dione **2i**

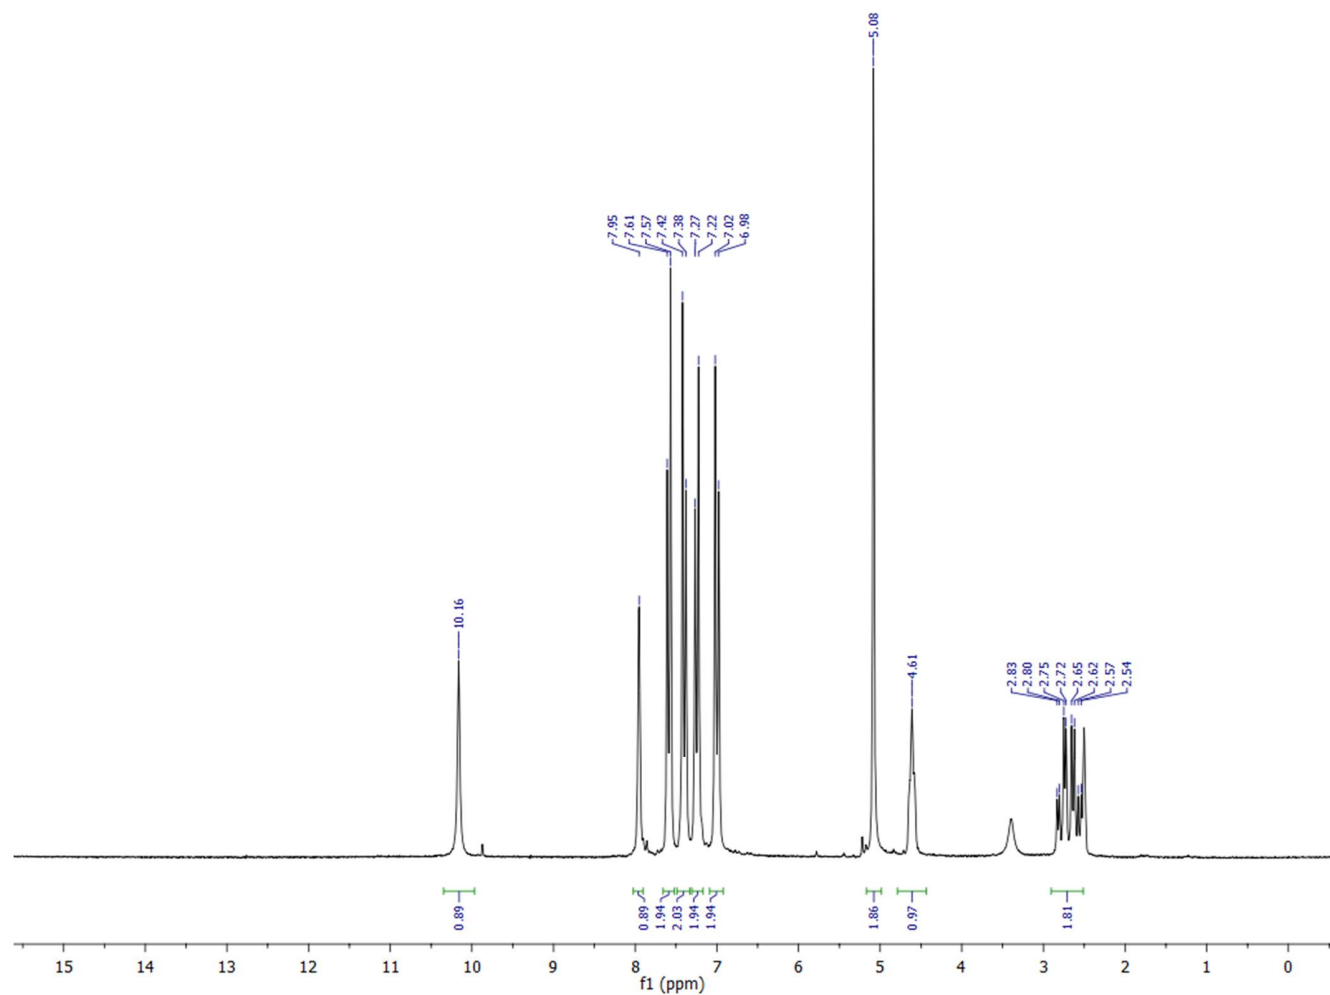

Figure S17. <sup>1</sup>H NMR spectrum of **2i**

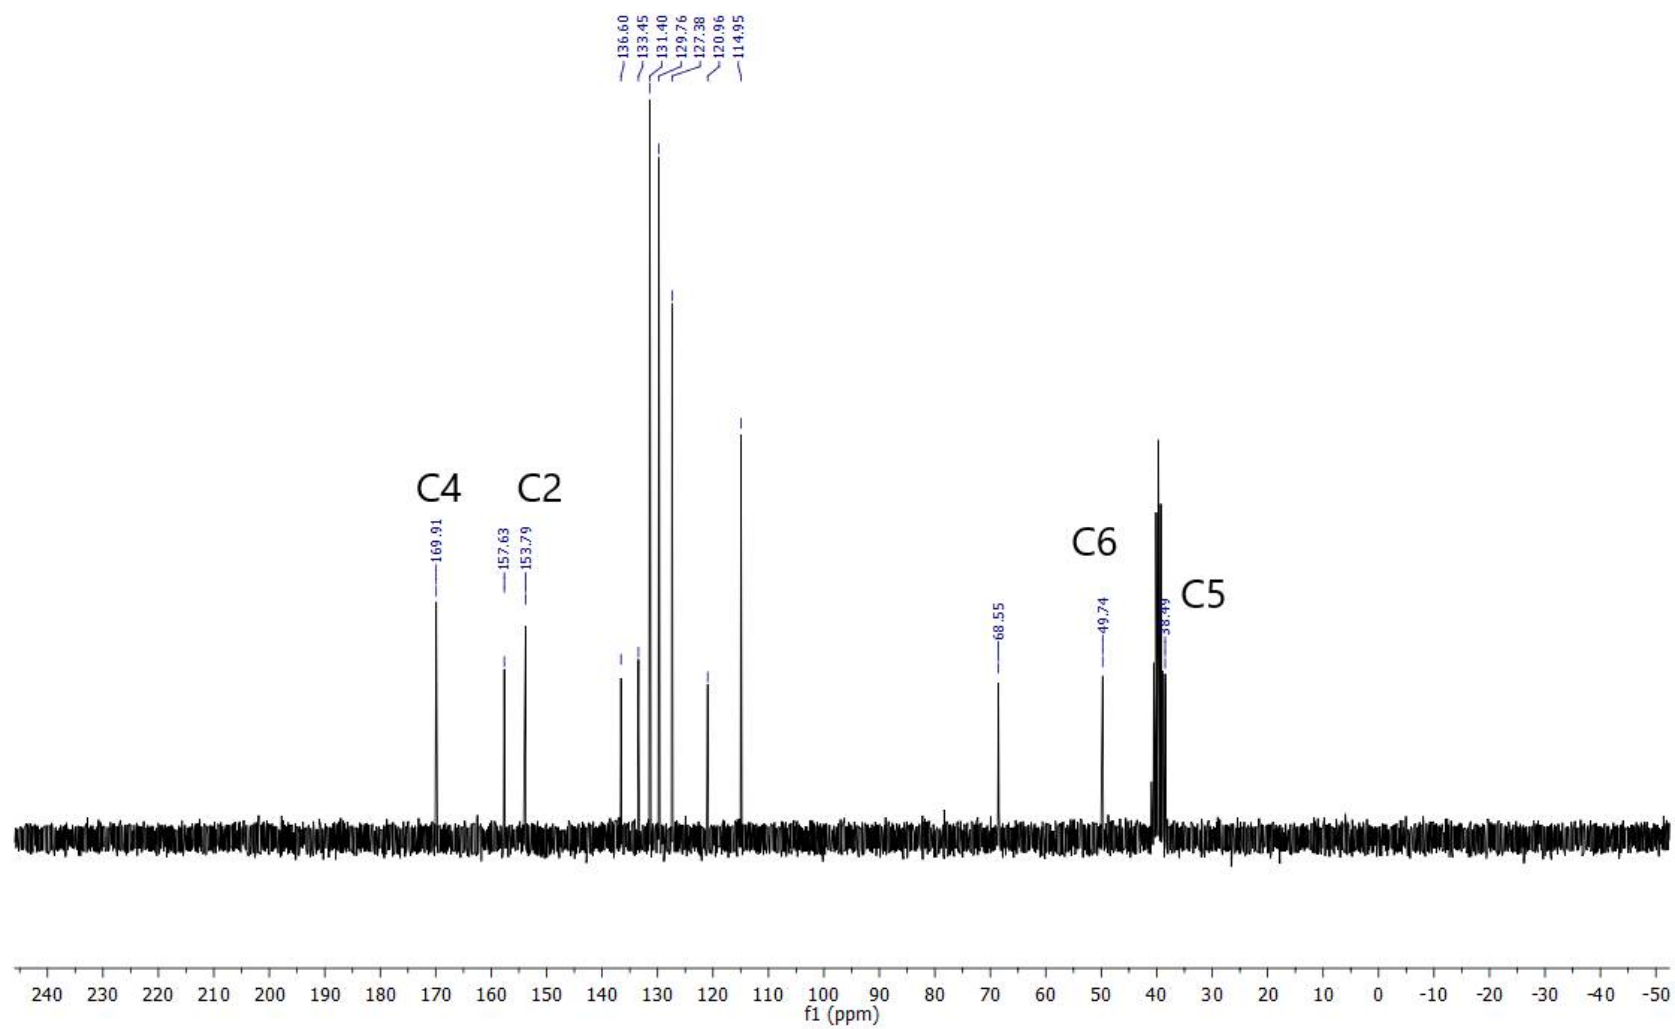

Figure S18. <sup>13</sup>C NMR spectrum of 2i

dihydro-6-(4'-methoxyphenyl)pyrimidine-2,4(1H,3H)-dione **2j**

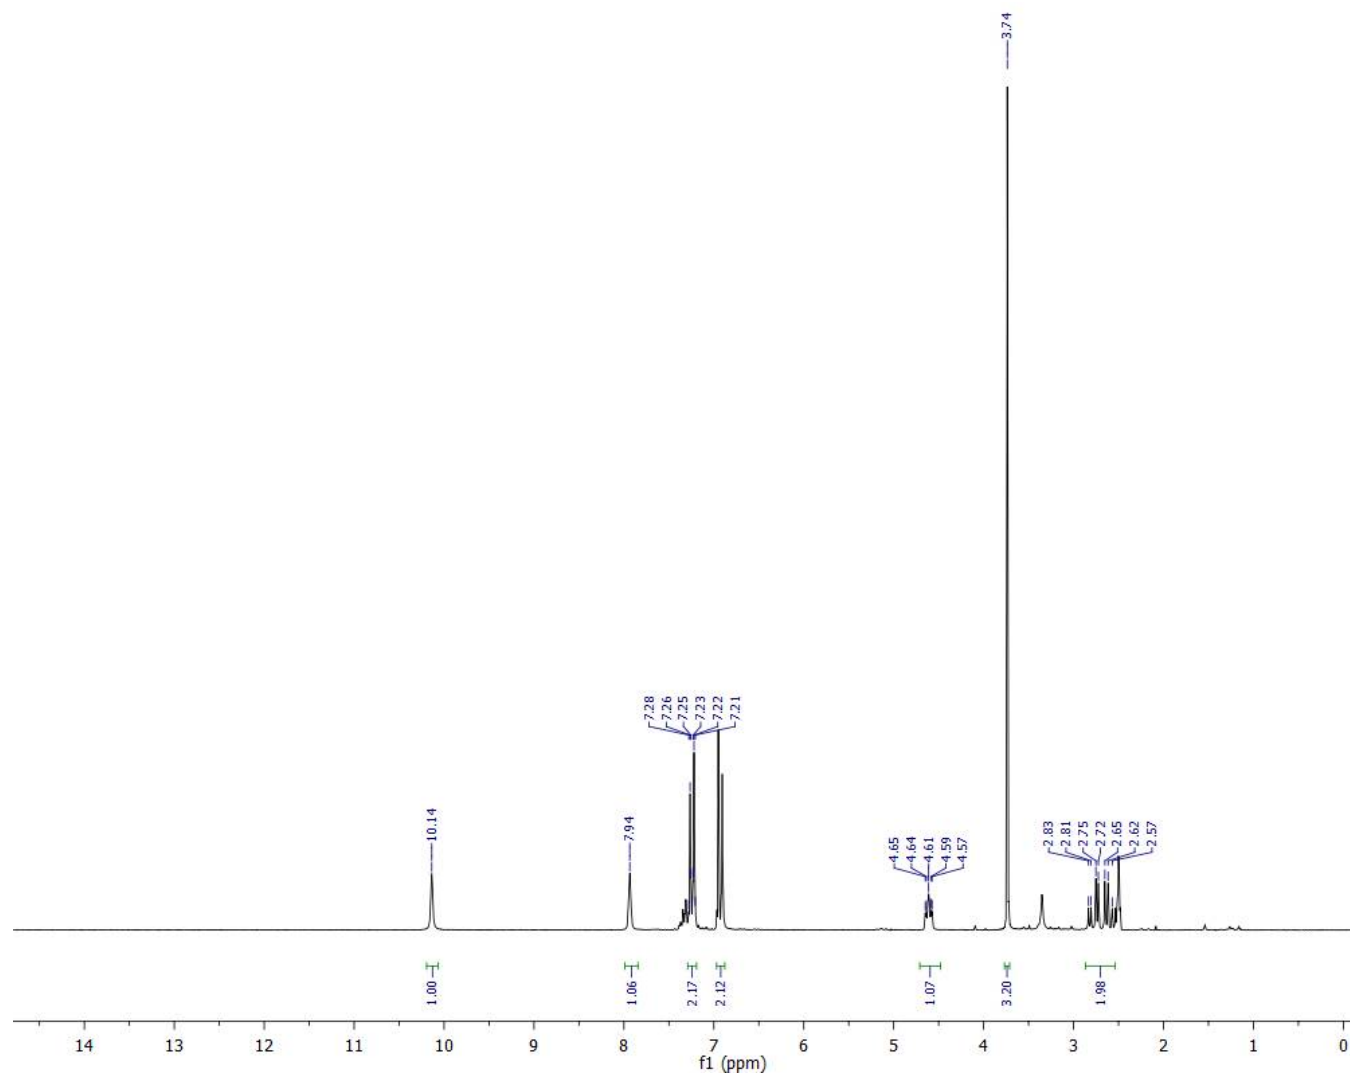

Figure S19. <sup>1</sup>H NMR spectrum of **2j**

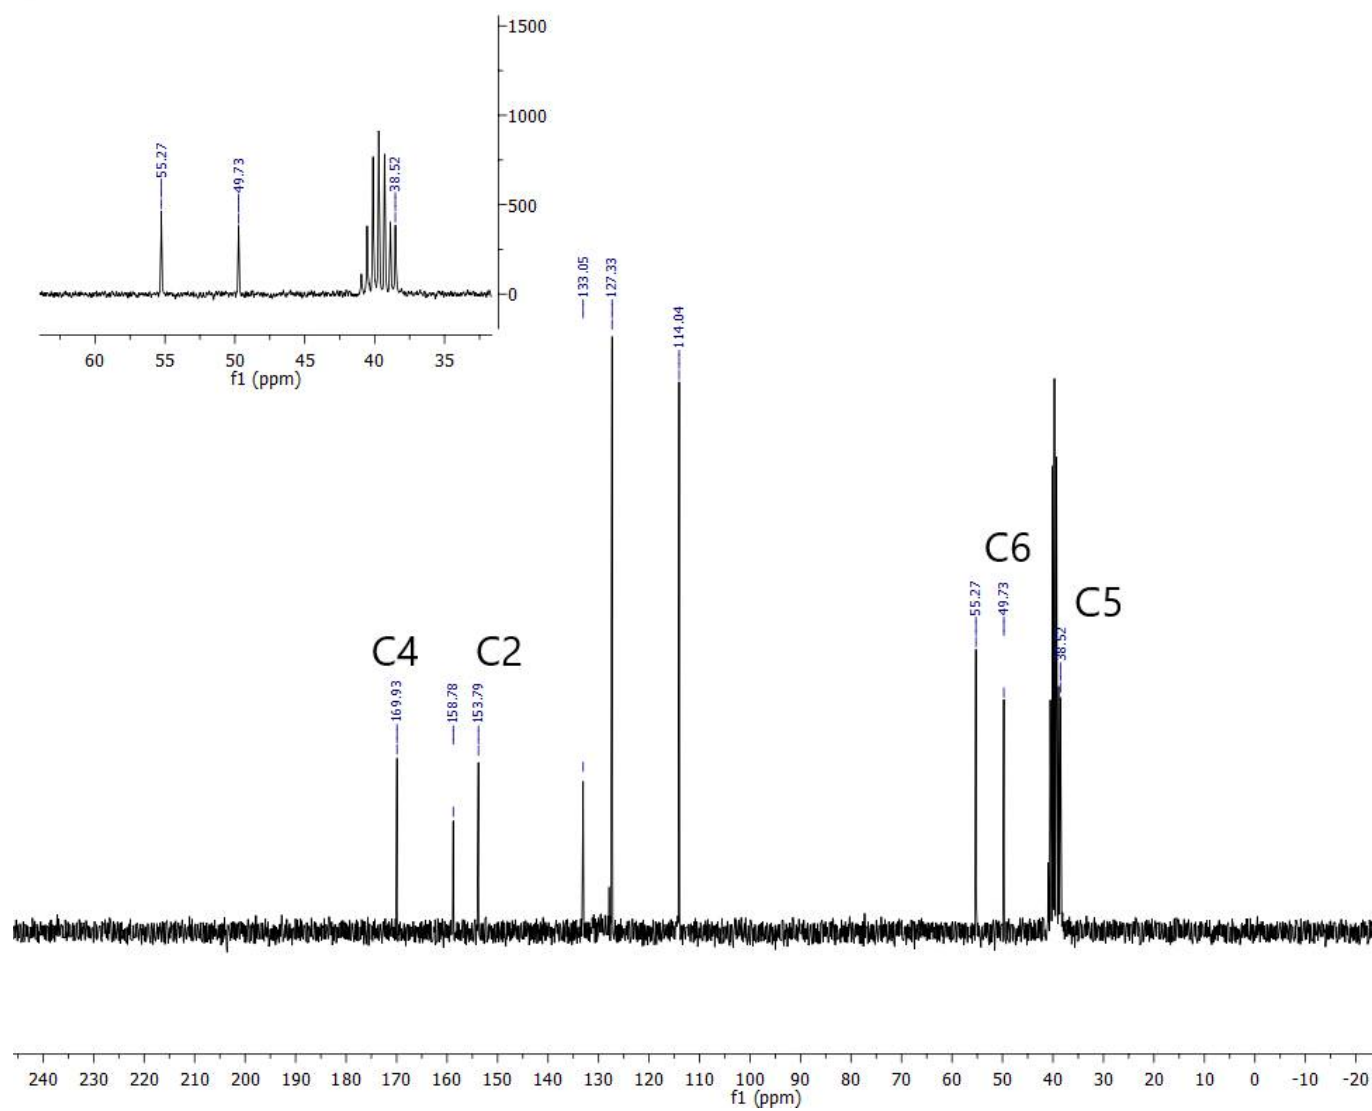

Figure S20.  $^{13}\text{C}$  NMR spectrum of 2j

6-(3',4'-dimethoxyphenyl)-dihydropyrimidine-2,4(1*H*,3*H*)-dione **2k**

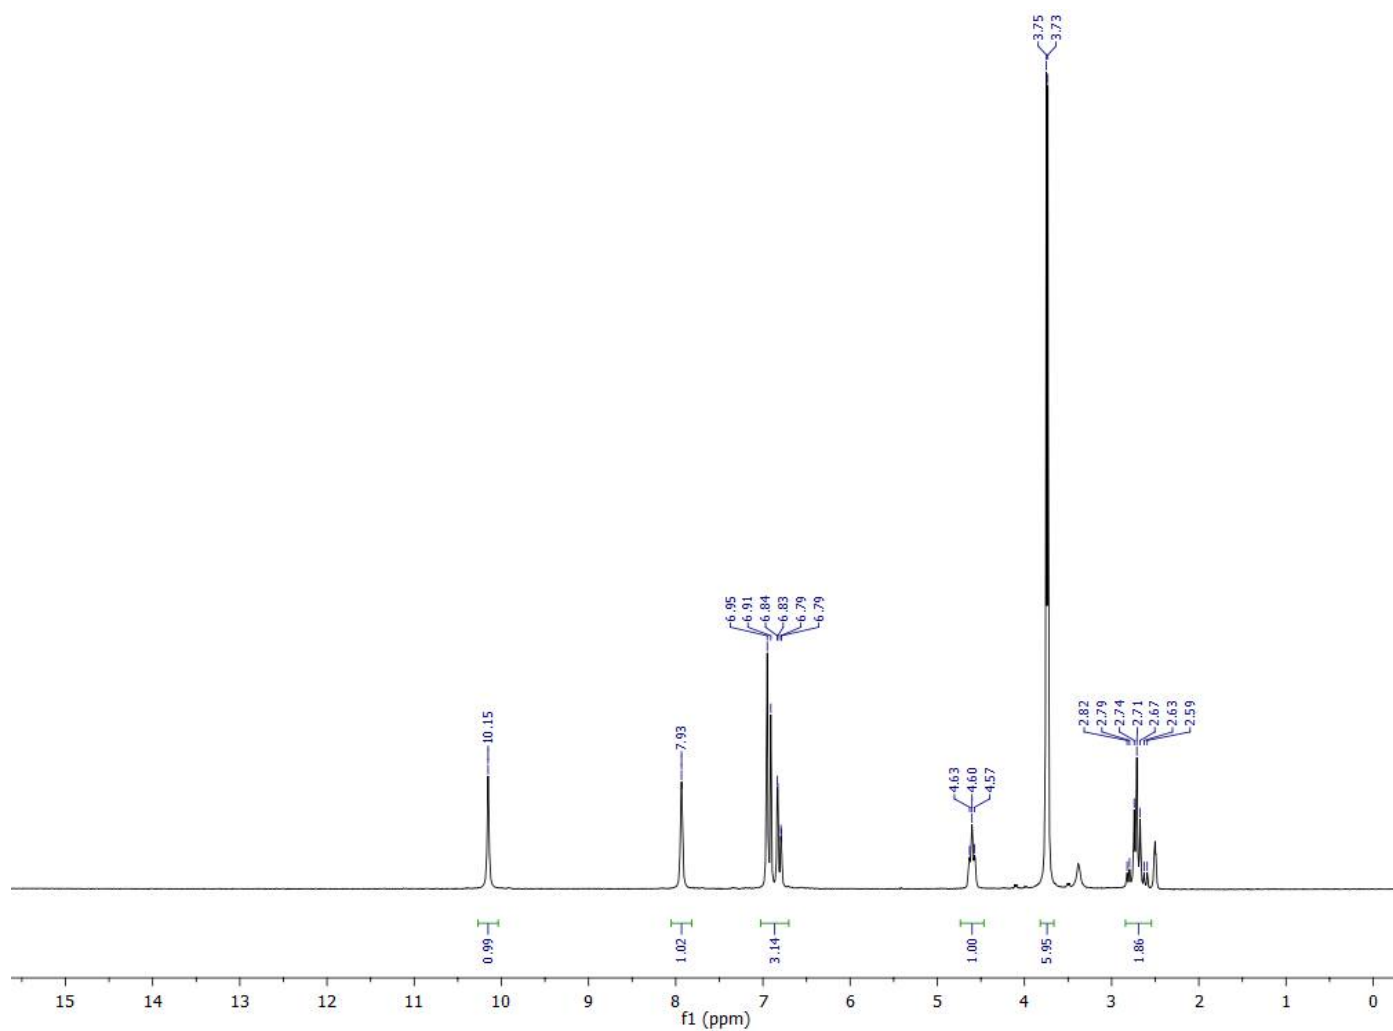

Figure S21. <sup>1</sup>H NMR spectrum of **2k**



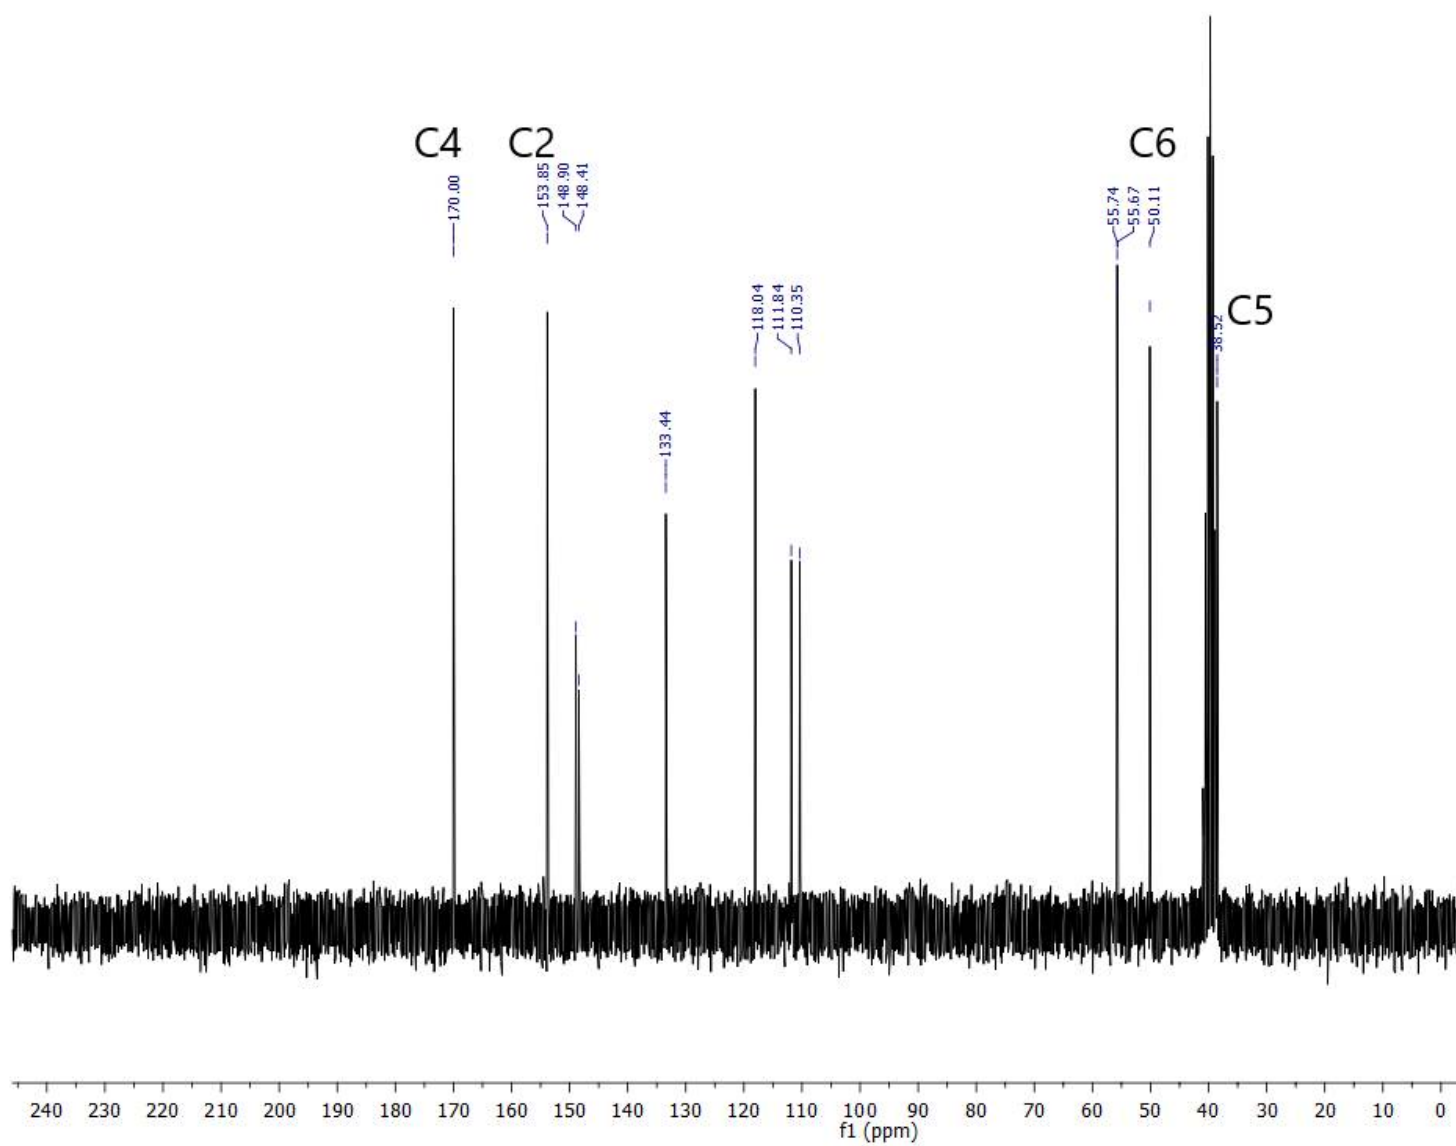

Figure S22.  $^{13}\text{C}$  NMR spectrum of 2k

dihydro-6-(3',4',5'-trimethoxyphenyl)pyrimidine-2,4(1H,3H)-dione **2I**

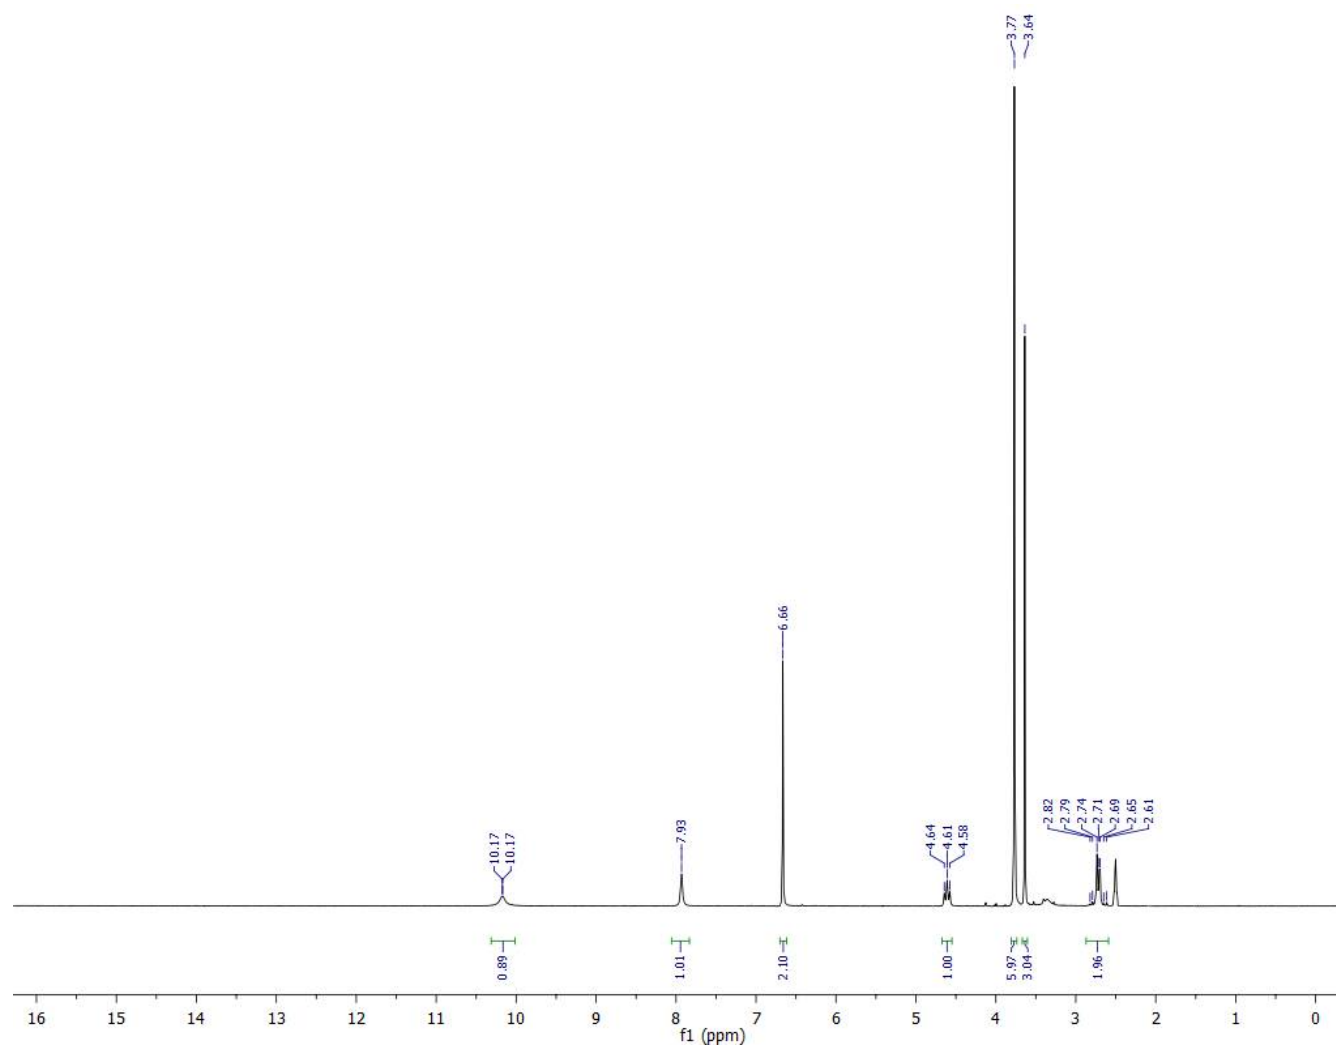

Figure S23. <sup>1</sup>H NMR spectrum of **2I**

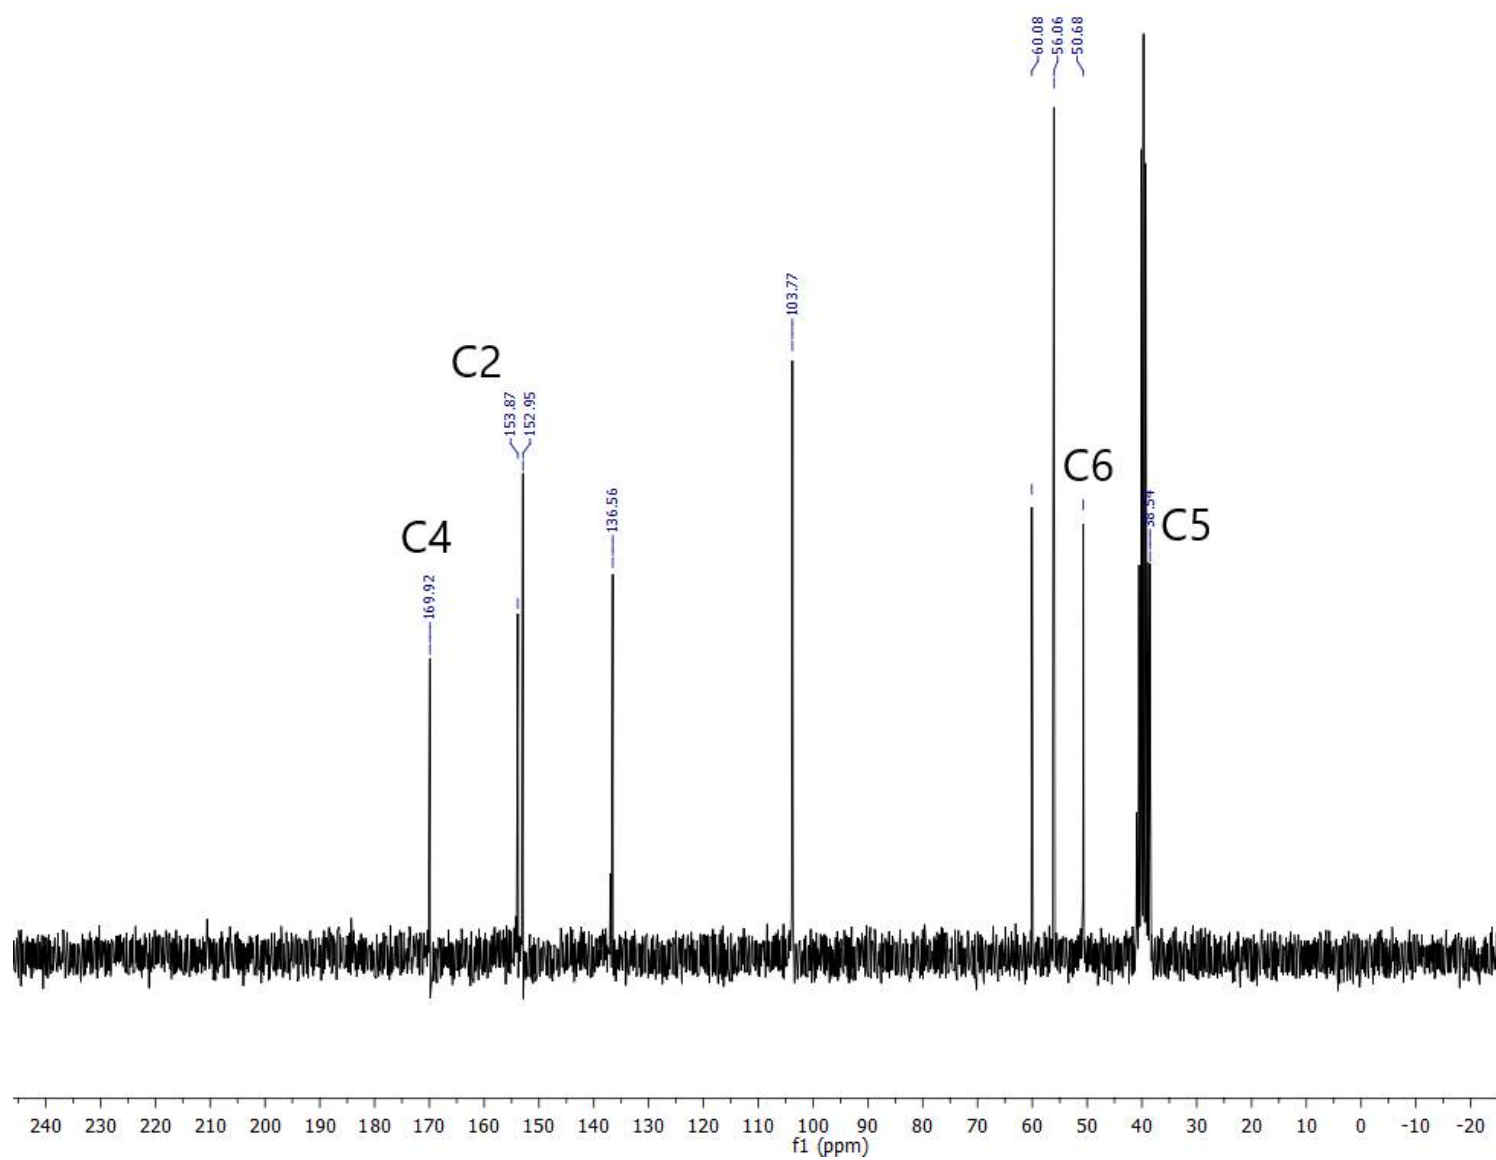

Figure S24.  $^{13}\text{C}$  NMR spectrum of 2I

6-(4'-ethoxy-3'-methoxyphenyl)-dihydropyrimidine-2,4(1*H*,3*H*)-dione **2m**

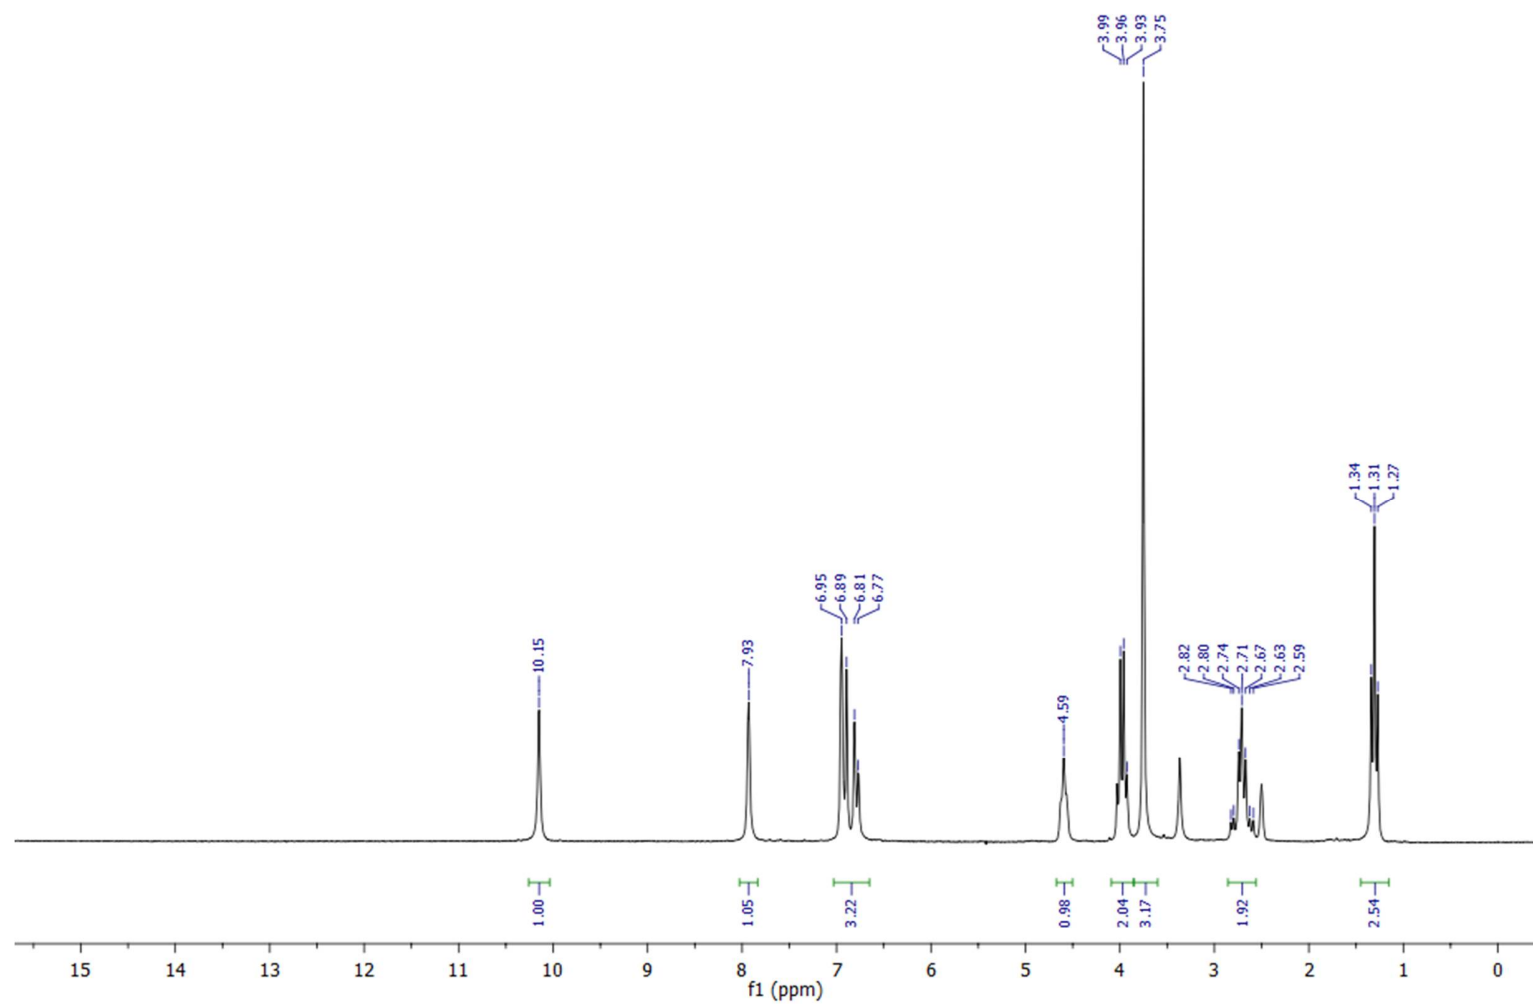

Figure S25. <sup>1</sup>H NMR spectrum of **2m**

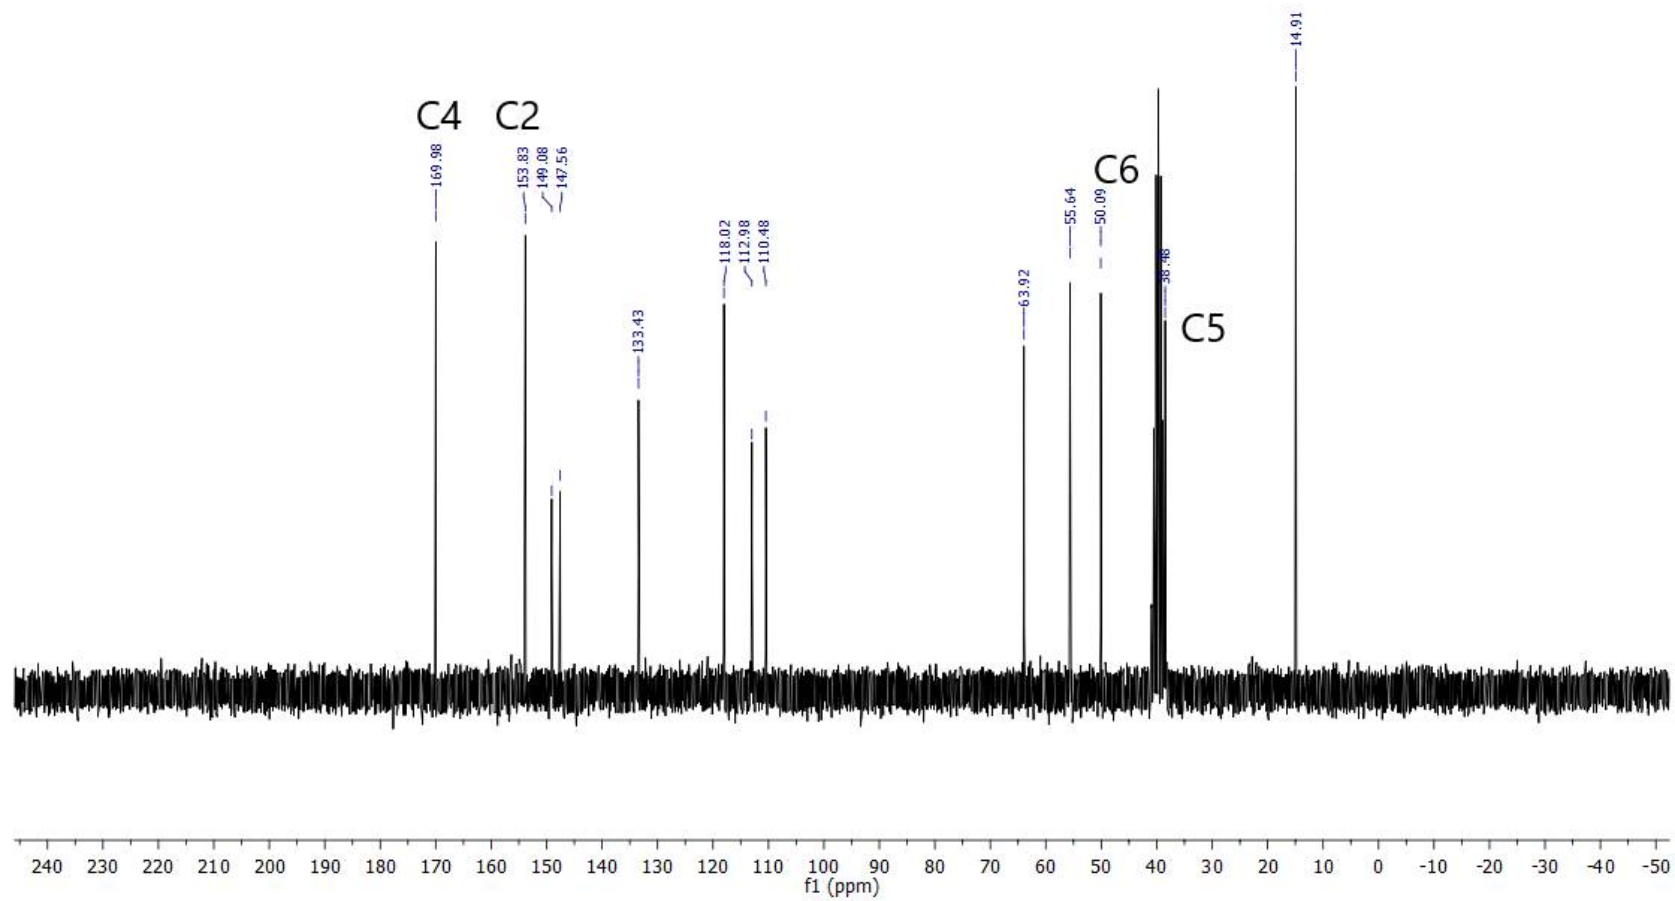

Figure S26. <sup>13</sup>C NMR spectrum of 2m

6-(4'-propoxy-3'-methoxyphenyl)-dihydropyrimidine-2,4(1H,3H)-dione **2n**

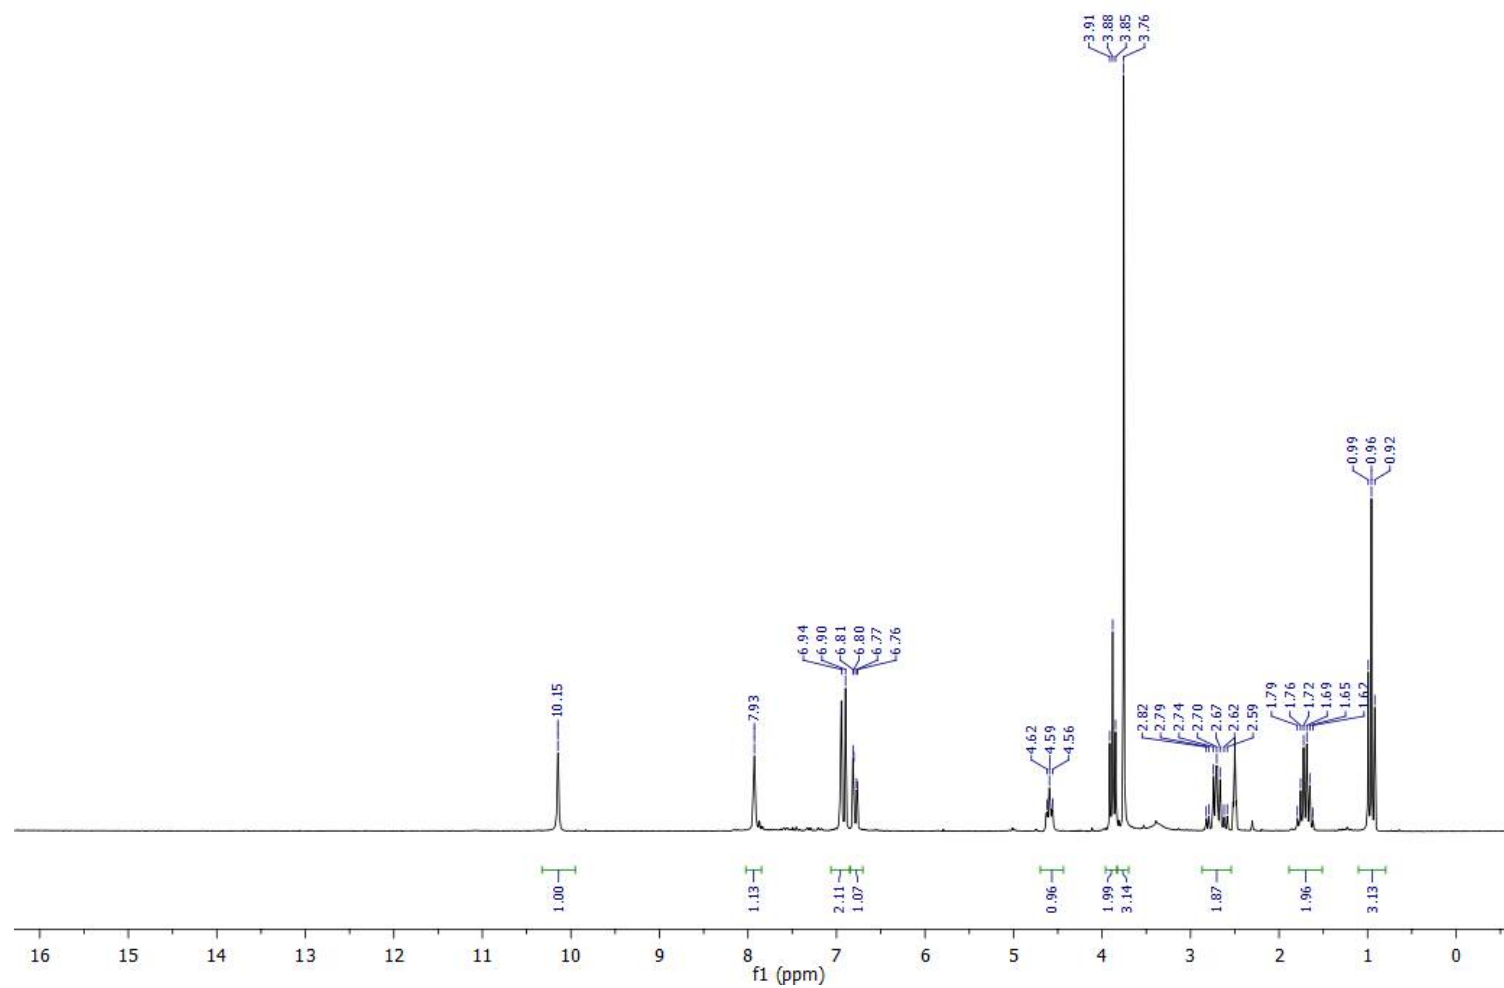

Figure S27. <sup>1</sup>H NMR spectrum of **2n**

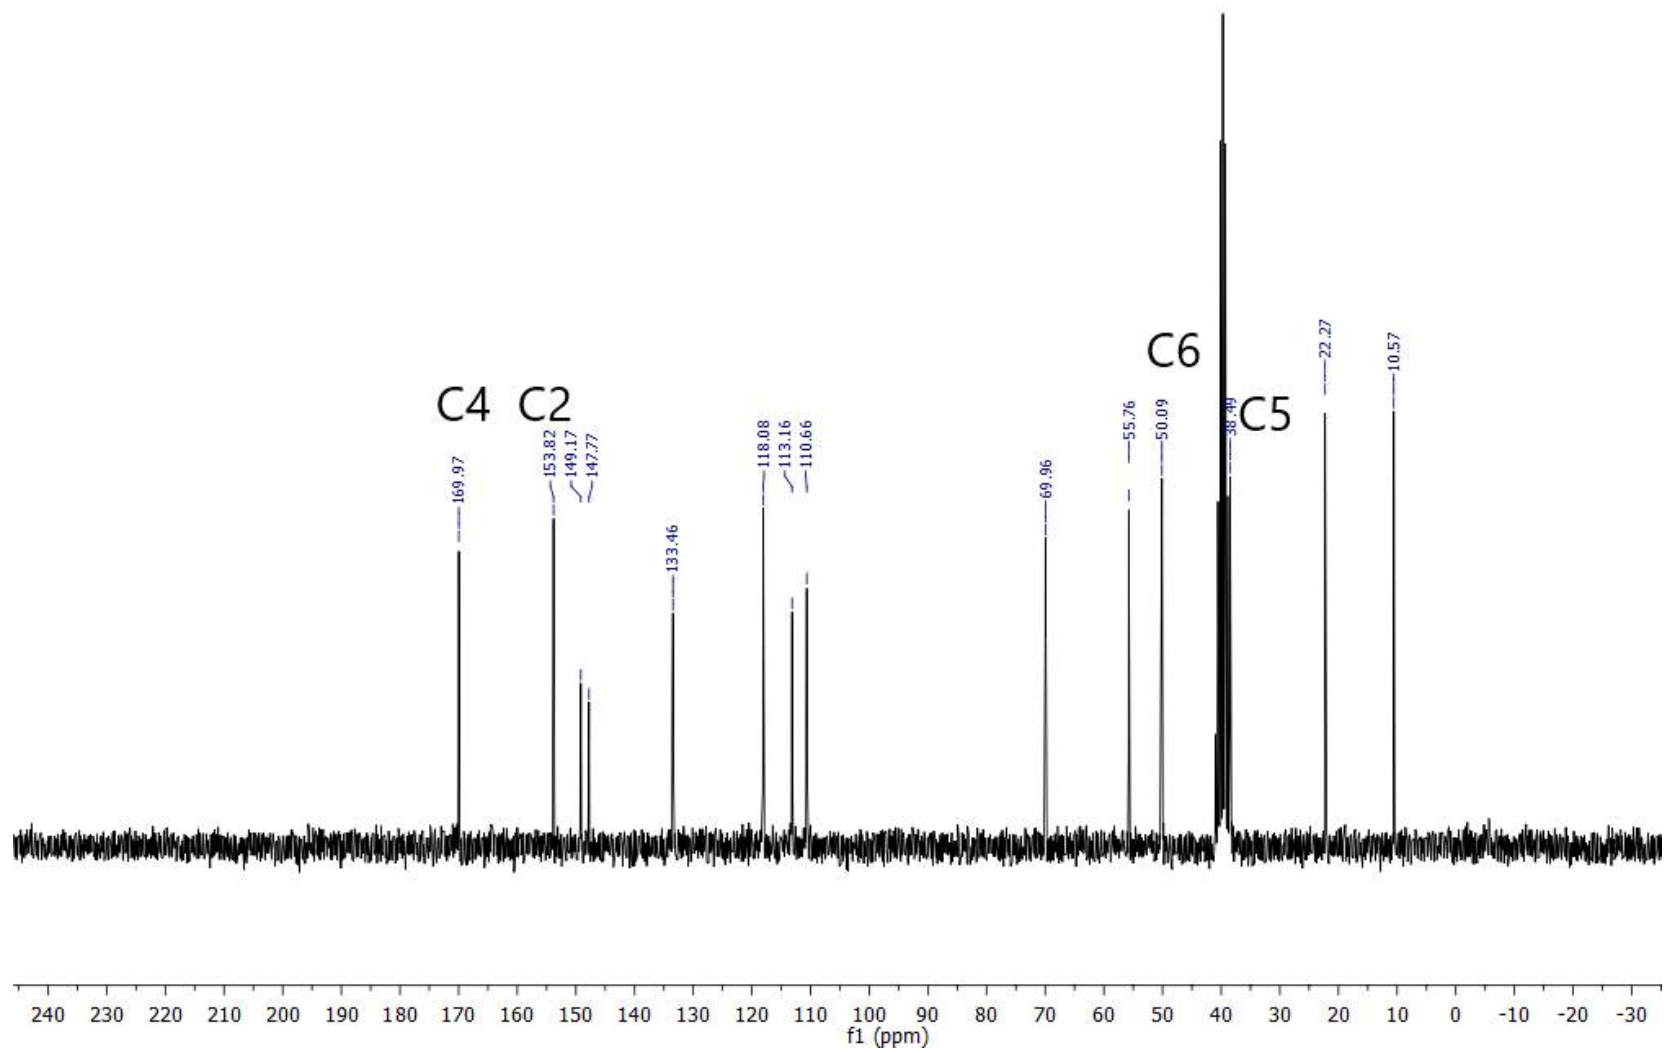

Figure S28. <sup>13</sup>C NMR spectrum of 2n

6-(4'-butoxy-3'-methoxyphenyl)-dihydropyrimidine-2,4(1*H*,3*H*)-dione **2o**

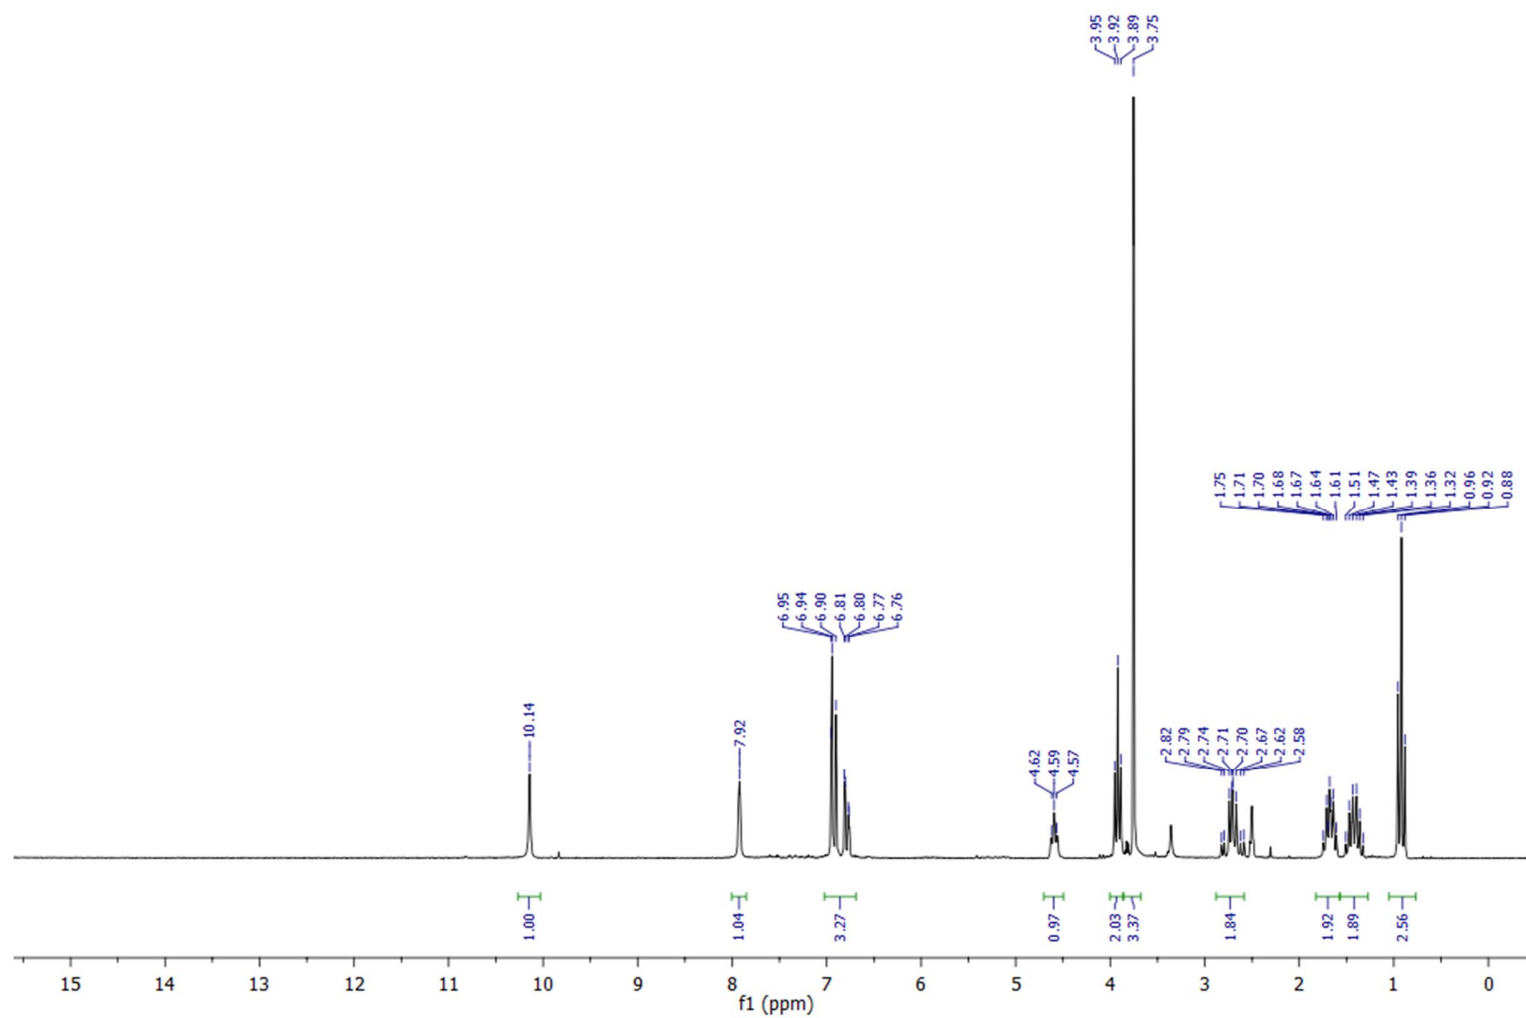

Figure S29. <sup>1</sup>H NMR spectrum of **2o**



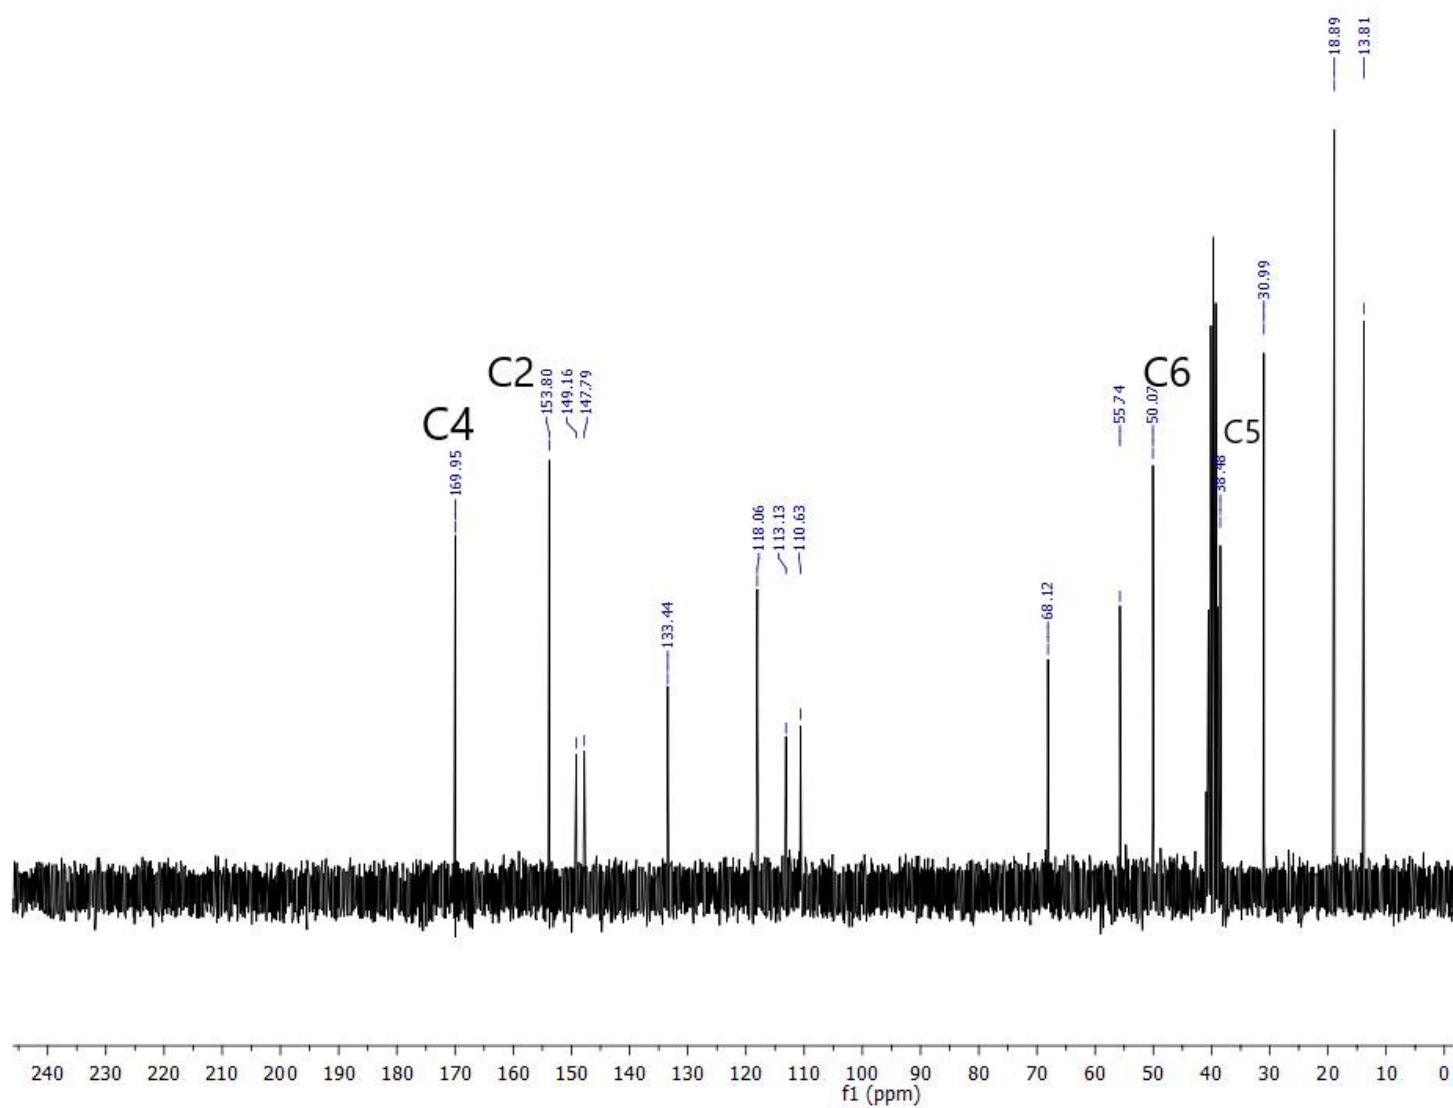

Figure S30. <sup>13</sup>C NMR spectrum of **2o**

6-(4'-benzyloxy-3'-methoxyphenyl)-dihydropyrimidine-2,4(1*H*,3*H*)-dione **2p**

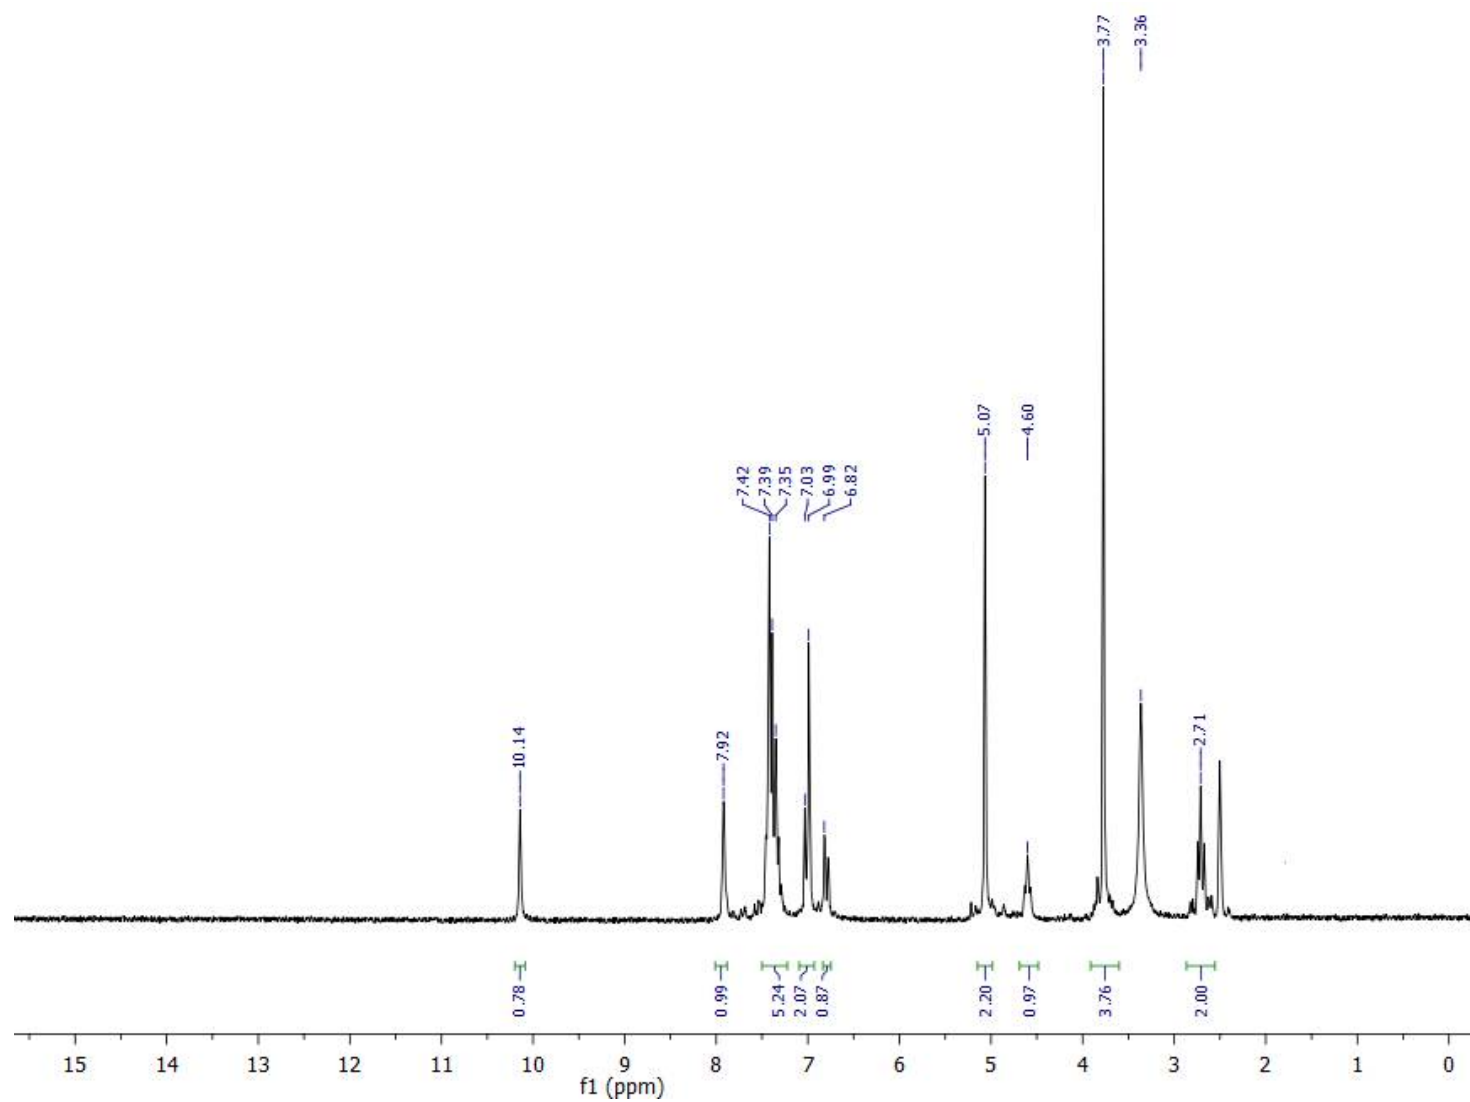

Figure S31. <sup>1</sup>H NMR spectrum of **2p**

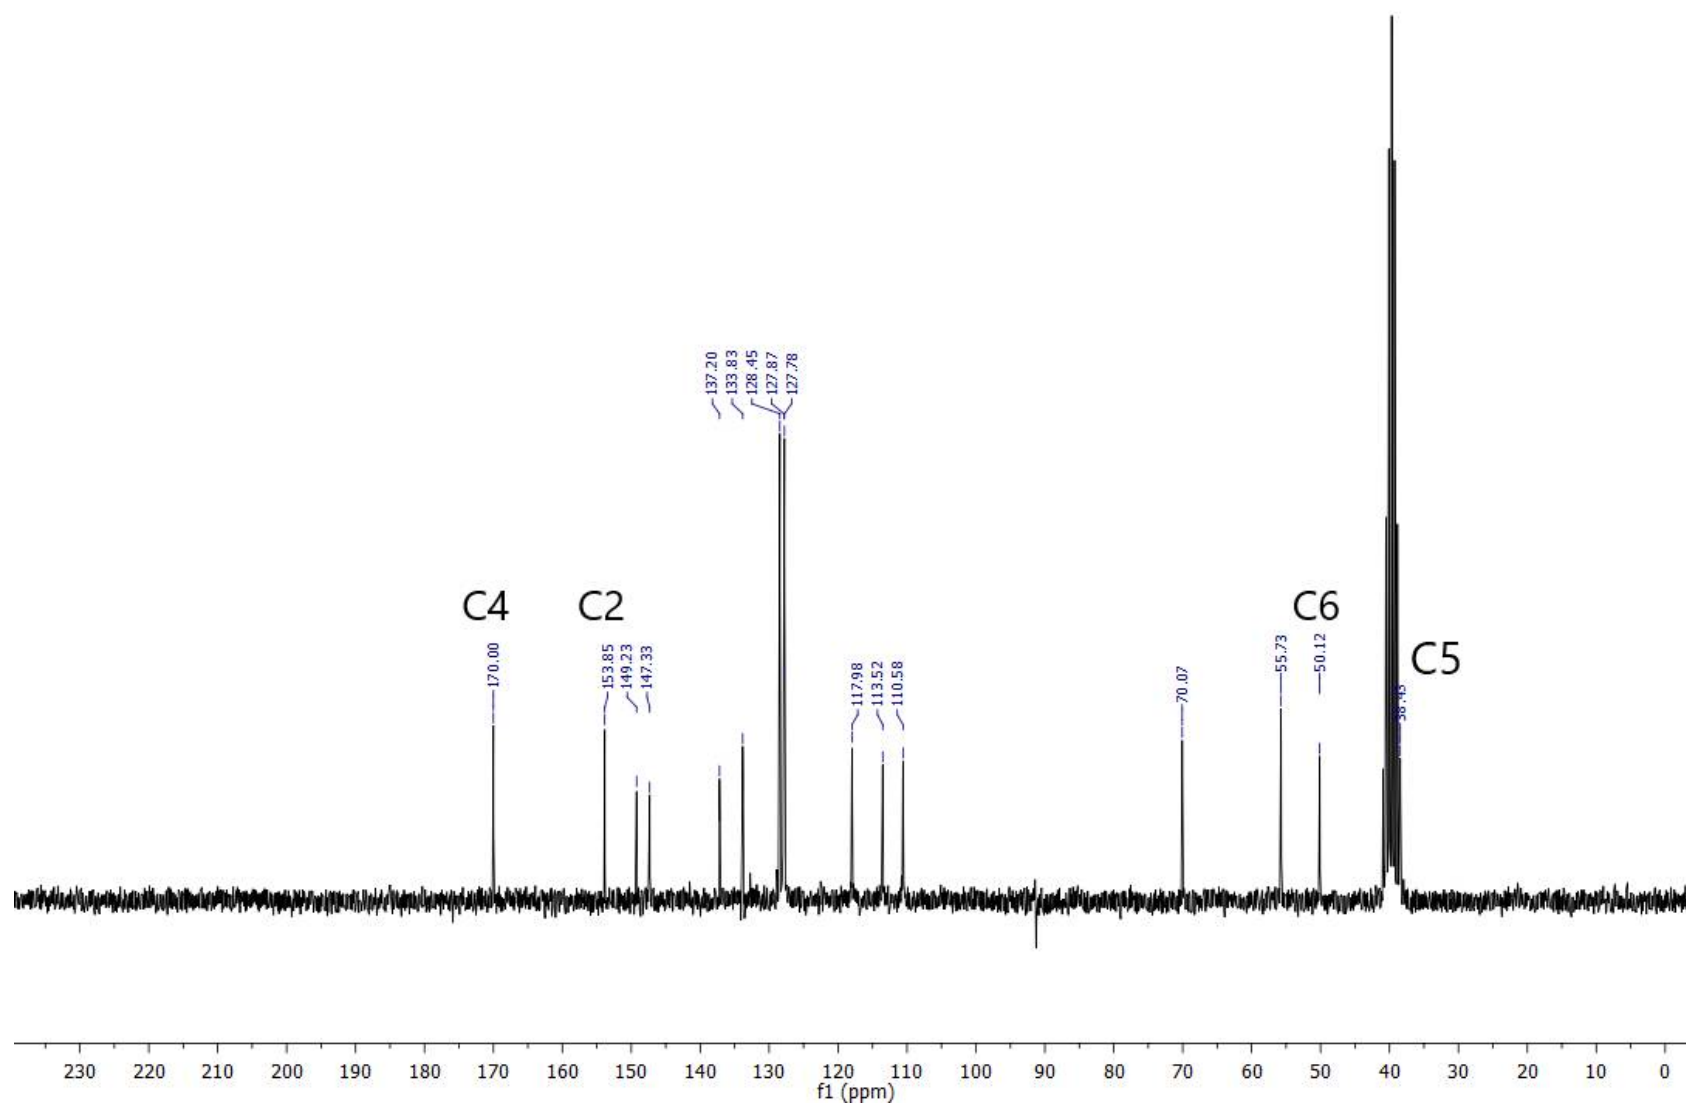

Figure S32. <sup>13</sup>C NMR spectrum of 2p

6-(4'-(3''-methylbenzyloxy)-3'-methoxyphenyl)-dihydropyrimidine-2,4(1*H*,3*H*)-dione **2q**

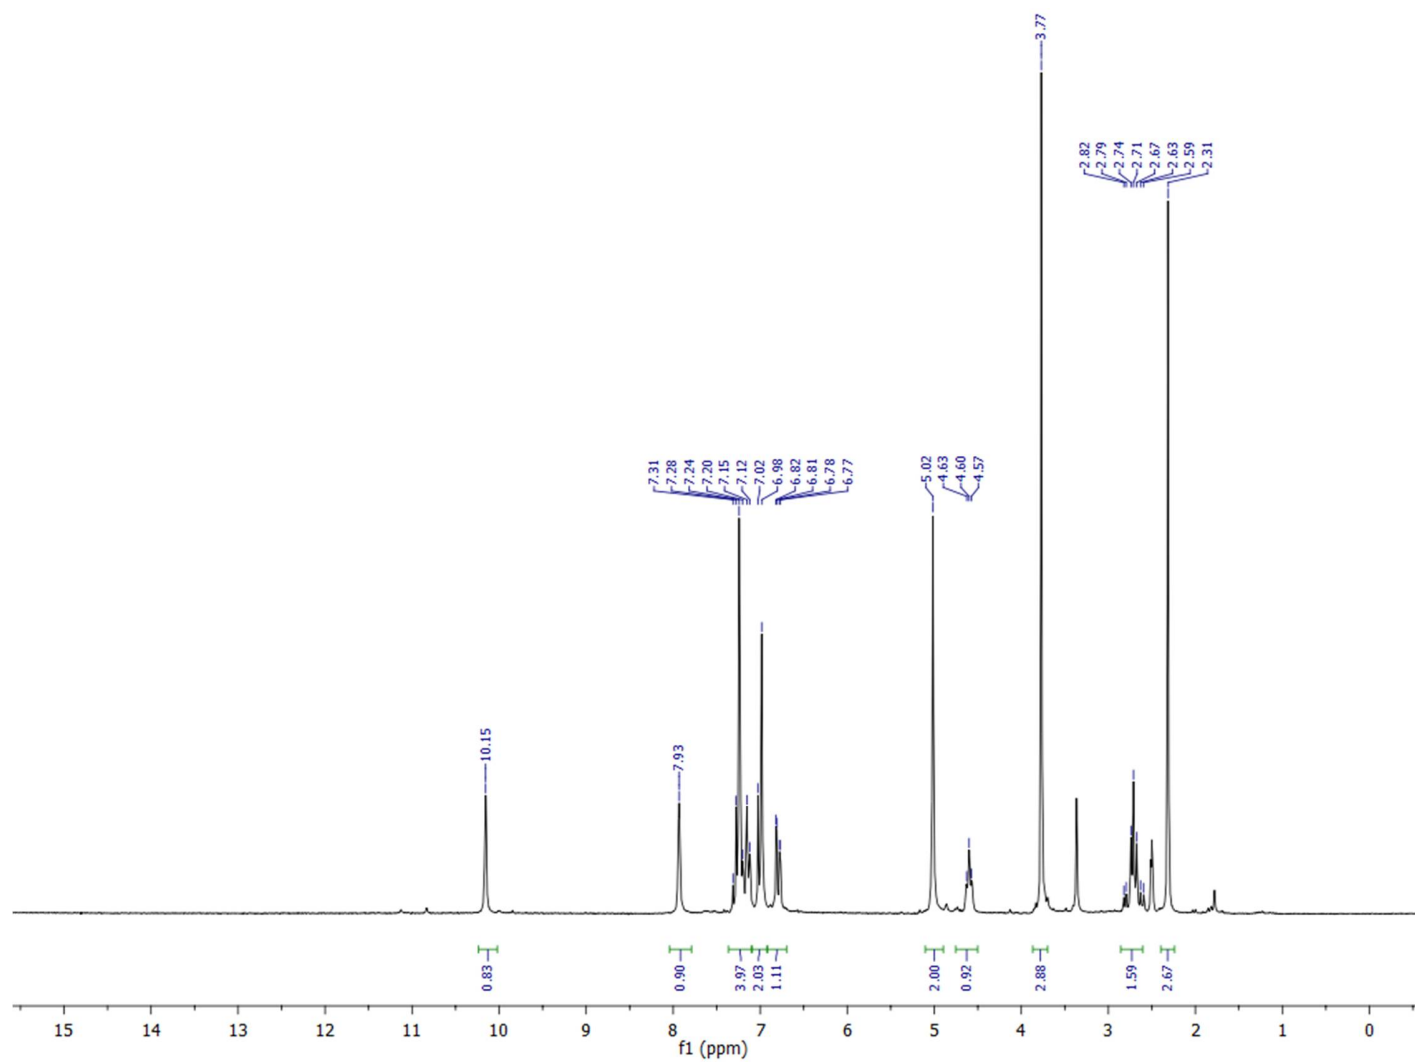

Figure S33. <sup>1</sup>H NMR spectrum of **2q**

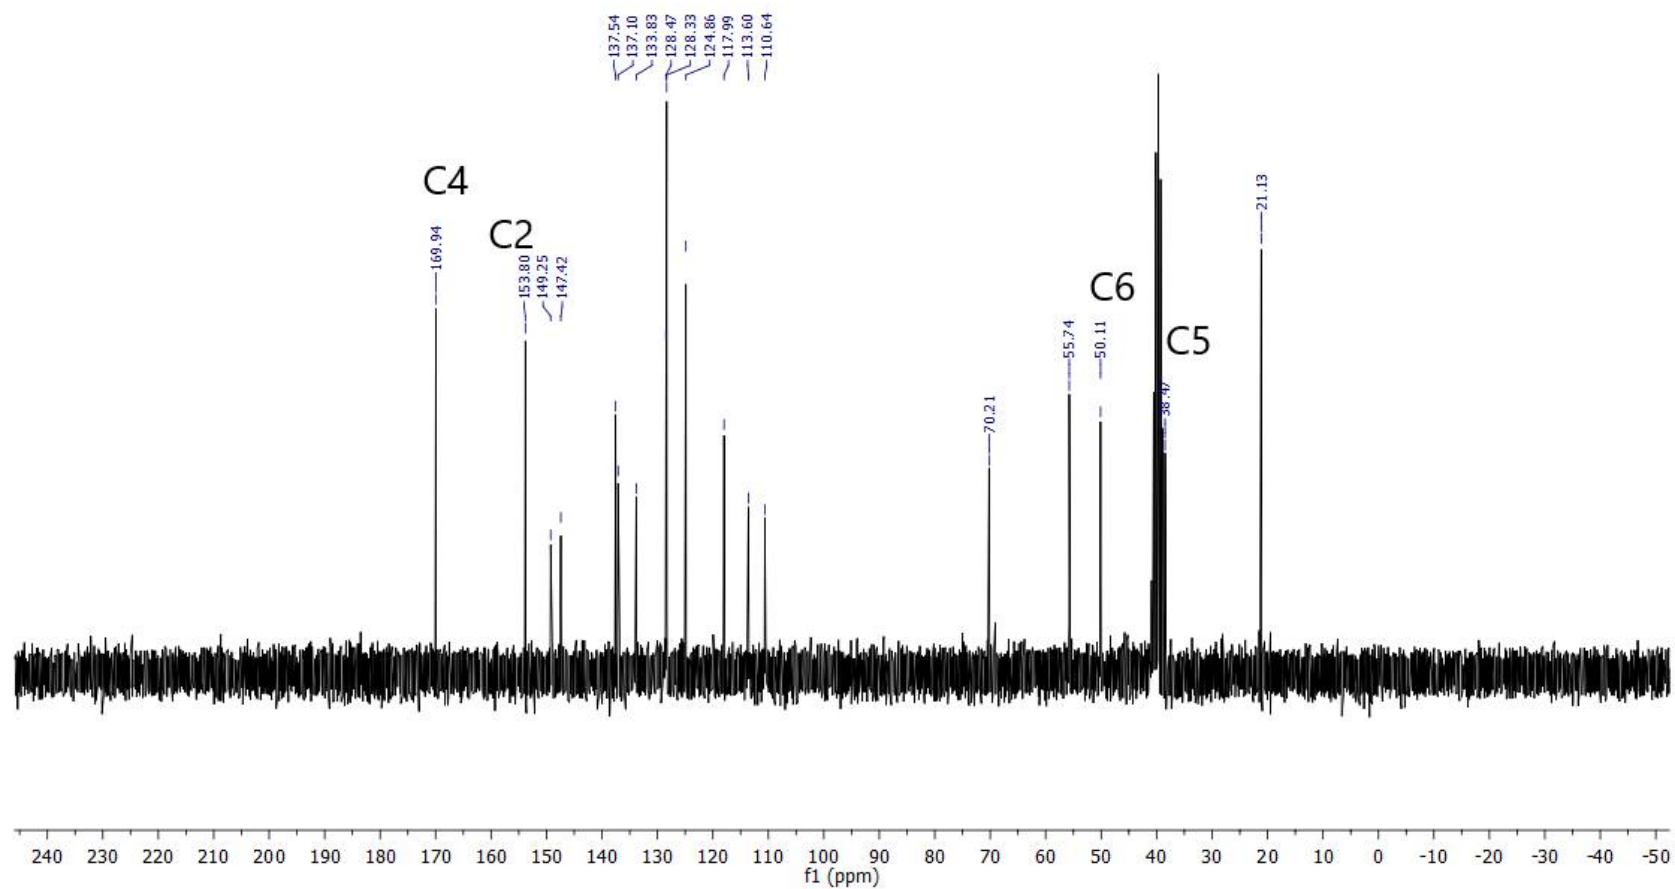

Figure S34. <sup>13</sup>C NMR spectrum of 2q

6-(4'-(4''-methylbenzyloxy)-3'-methoxyphenyl)-dihydropyrimidine-2,4(1H,3H)-dione **2r**

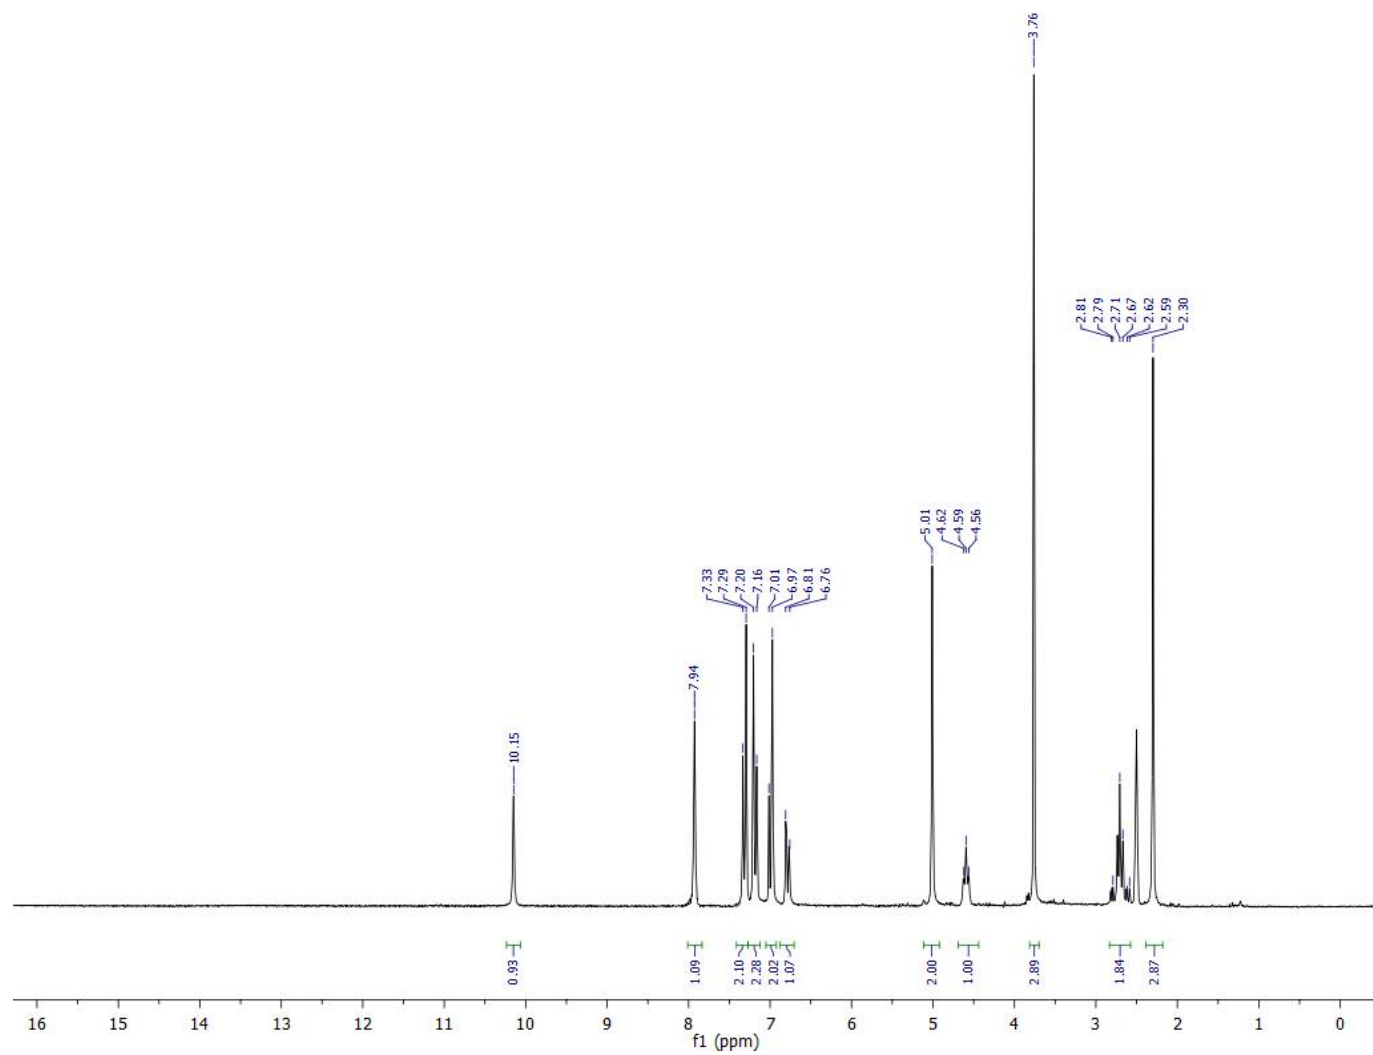

Figure S35. <sup>1</sup>H NMR spectrum of **2r**

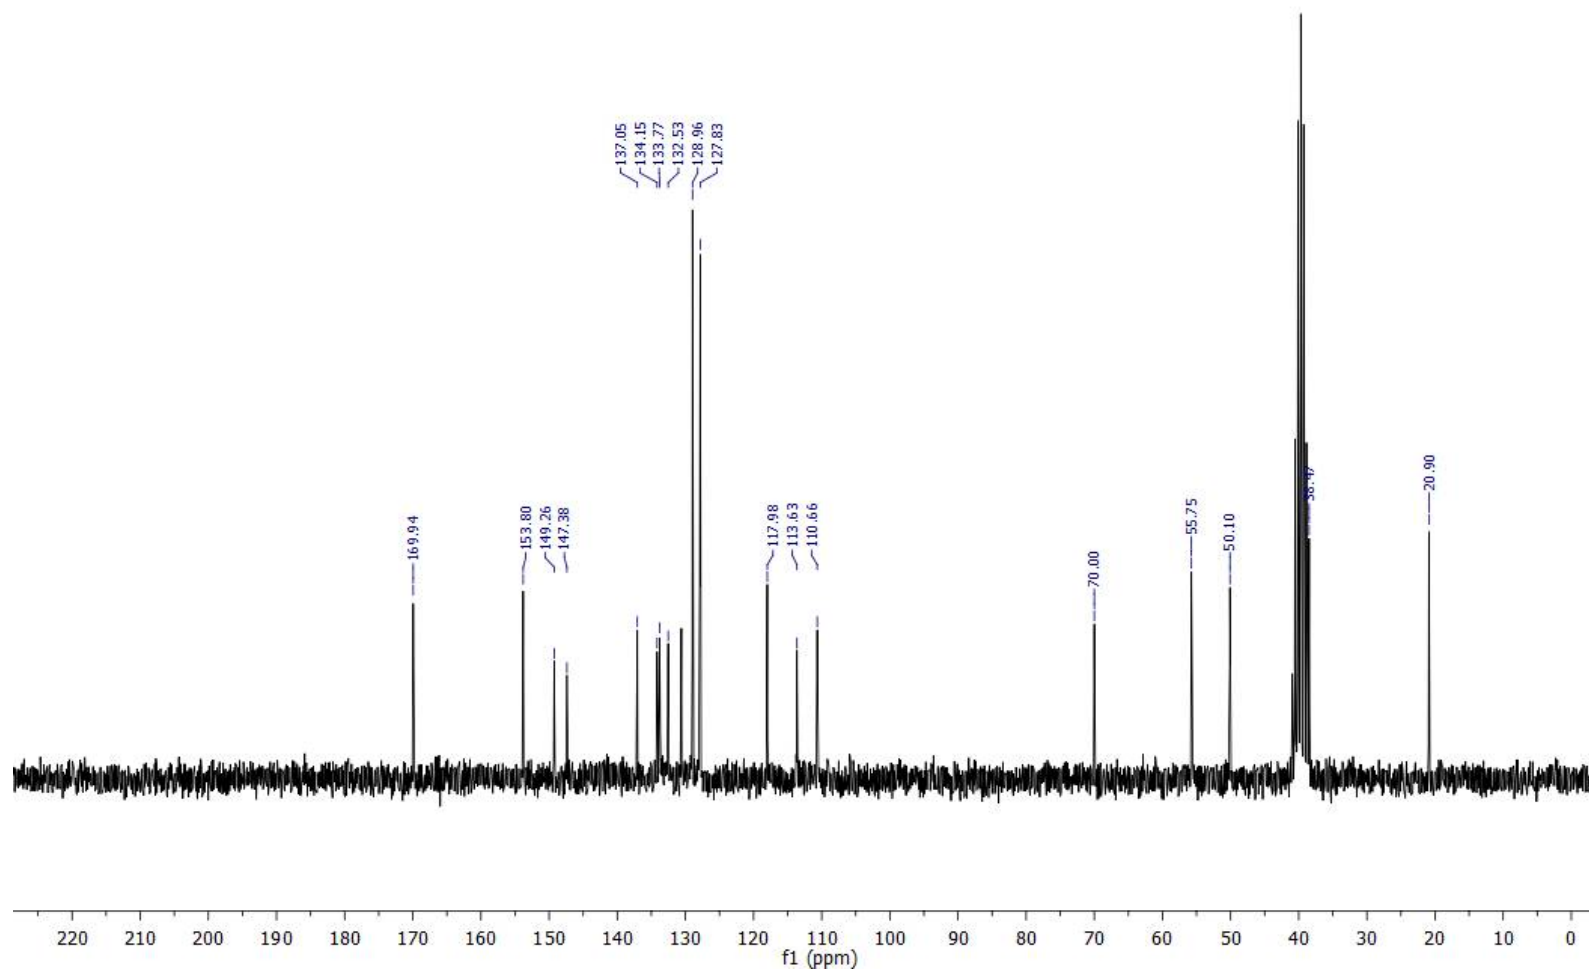

Figure S36. <sup>13</sup>C NMR spectrum of 2r

6-(4'-acetoxy-3'-methoxyphenyl)-dihydropyrimidine-2,4(1*H*,3*H*)-dione **2s**

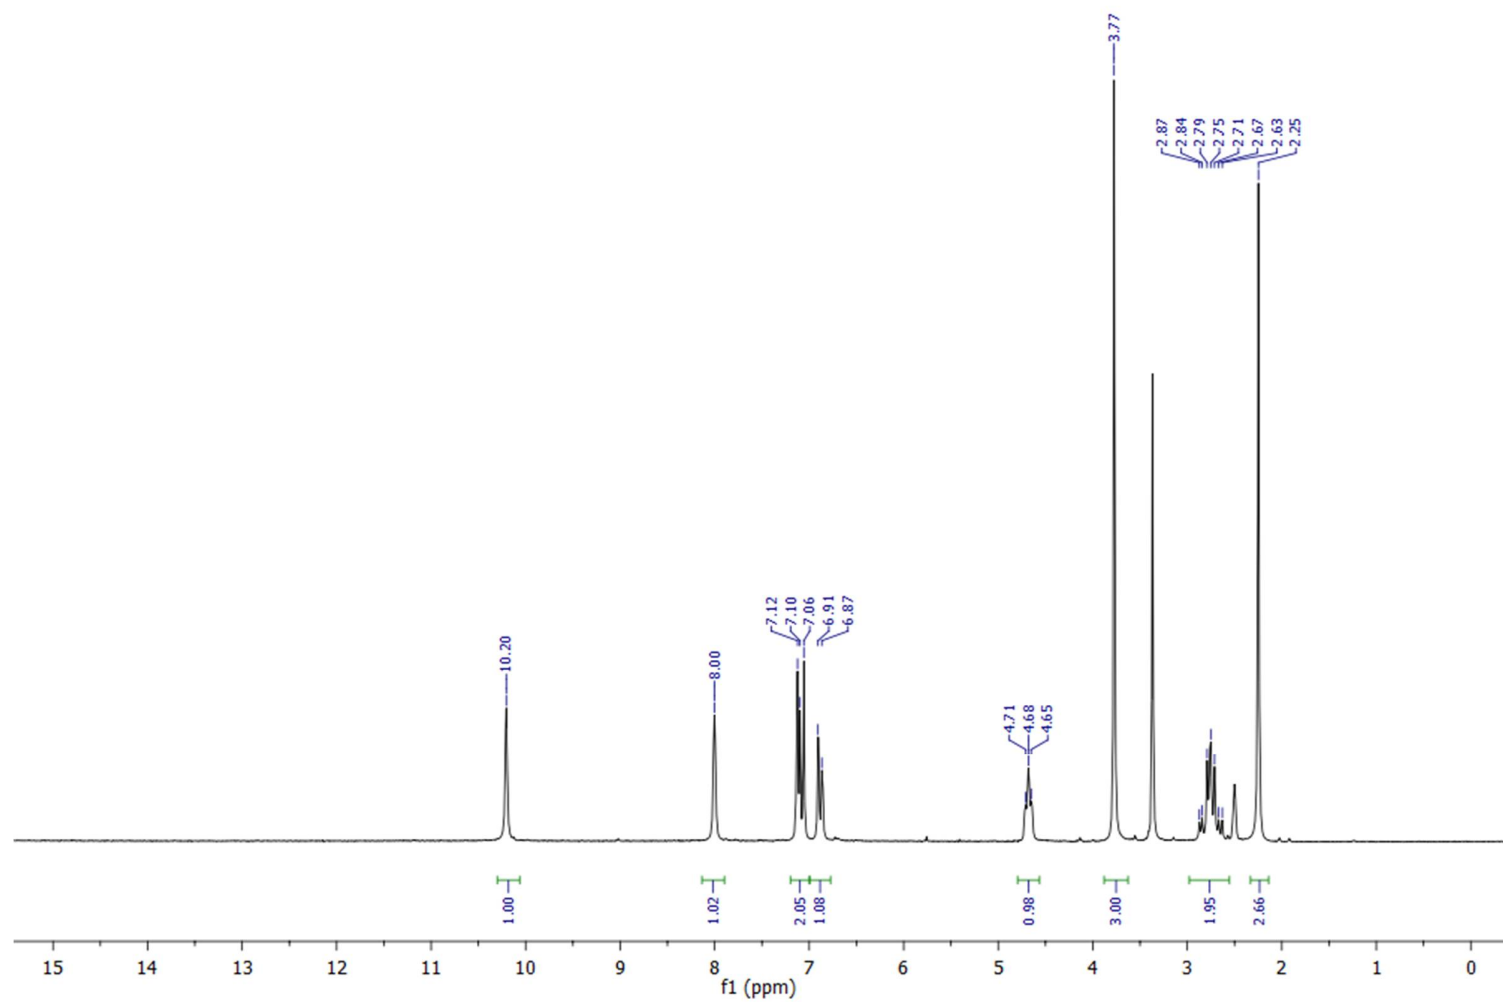

Figure S37. <sup>1</sup>H NMR spectrum of **2s**



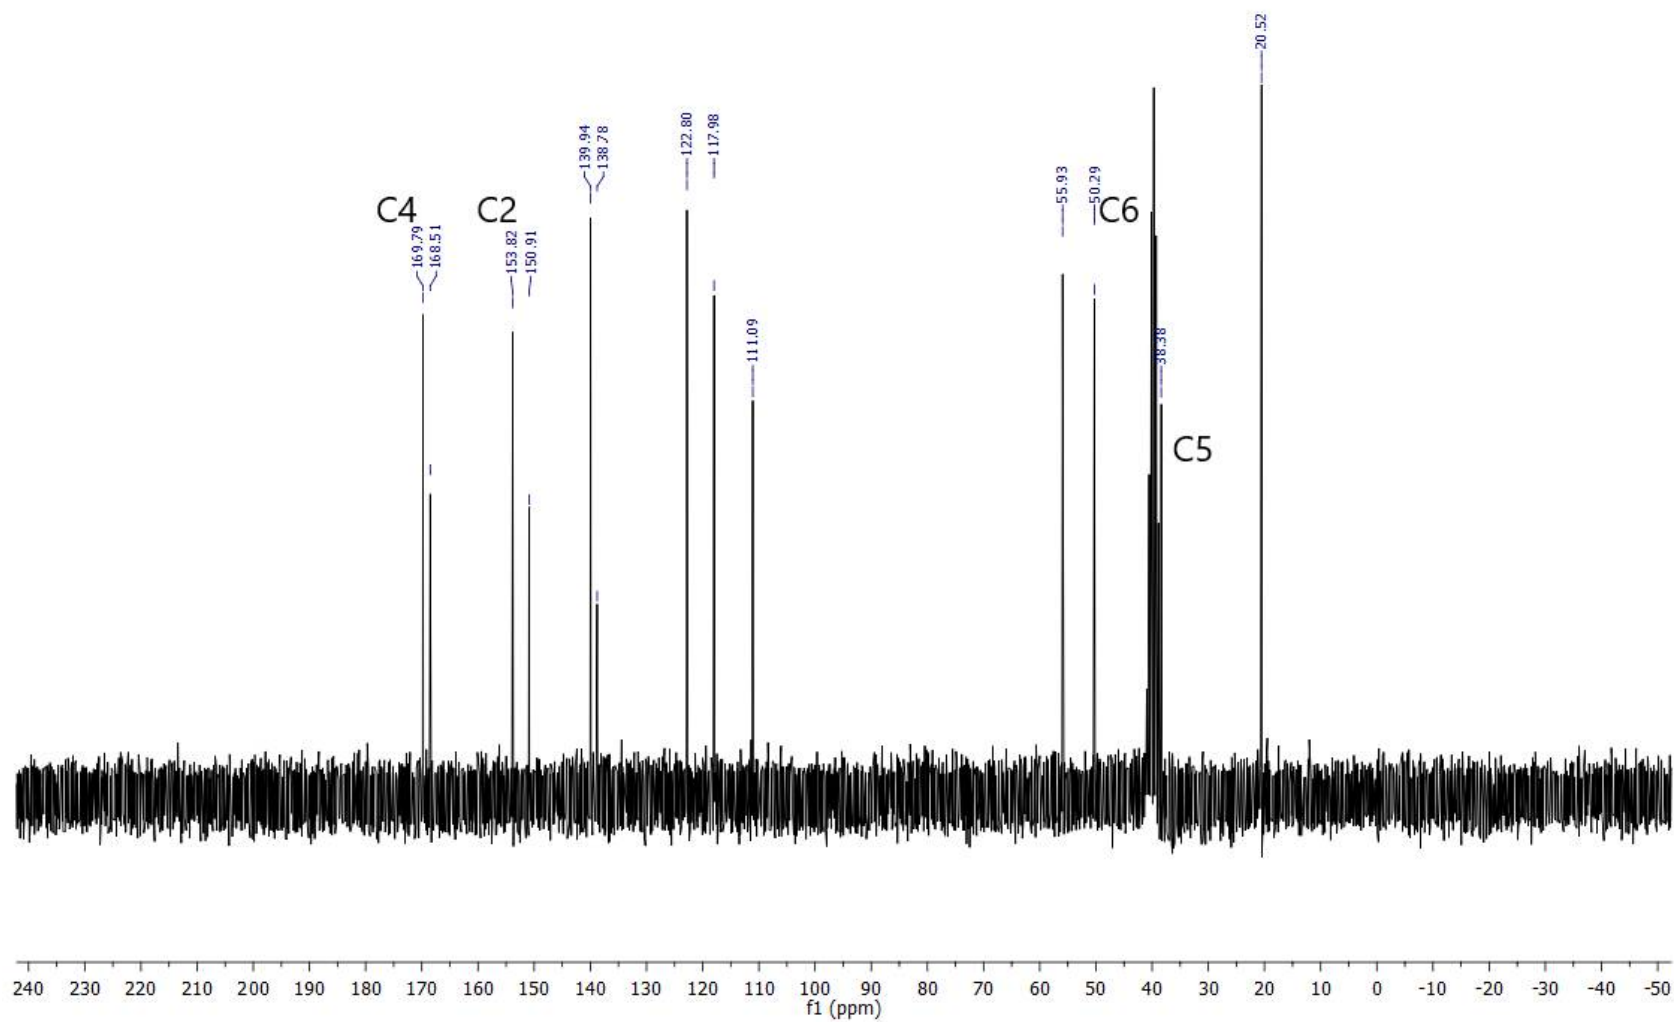

Figure S38. <sup>13</sup>C NMR spectrum of 2s
